# The direction and timing of theta and alpha traveling waves modulate human memory processing

**Uma R. Mohan<sup>\*1</sup>, Honghui Zhang<sup>\*2</sup>, Joshua Jacobs<sup>†1,3</sup>**

<sup>1</sup>Department of Biomedical Engineering, Columbia University

<sup>2</sup>Amazon Corporation, Seattle, Washington

<sup>3</sup>Department of Neurological Surgery, Columbia University

---

\*equal contributions

†Correspondence: [joshua.jacobs@columbia.edu](mailto:joshua.jacobs@columbia.edu), 351 Engineering Terrace, Mail Code 8904, 1210 Amsterdam Avenue, New York, NY 10027, 212-854-2445

## Abstract

To support a range of behaviors, the brain must flexibly coordinate neural activity across widespread brain regions. One potential mechanism for this coordination is a traveling wave, in which a neural oscillation propagates across the brain while organizing the order and timing of activity across regions<sup>1,2</sup>. Although traveling waves are present across the brain in various species<sup>3-5</sup>, their potential functional relevance remained unknown. Here, using rare direct human brain recordings, we demonstrate two novel functional roles for traveling waves of theta- and alpha-band (2–13 Hz) oscillations in the cortex. First, traveling waves propagate in different directions during separate cognitive processes. In episodic memory, traveling waves tended to propagate in posterior-to-anterior and anterior-to-posterior directions, respectively, during encoding and retrieval. Second, traveling waves are informative about the timing of behavior, with the phase of ongoing traveling waves indicating when subjects would retrieve memories. Because traveling waves of oscillations correspond to local neuronal spiking, these patterns indicate that rhythmic pulses of activity move across the brain with different directions and timing for separate behaviors. More broadly, our results suggest a fundamental role for traveling waves and oscillations in dynamically coordinating neural connectivity, by flexibly organizing the timing and directionality of network interactions across the cortex to support cognition and behavior.

## 1 Introduction

2 The brain supports a diverse range of behaviors, which requires the coordination of neural activity  
3 between different sets of regions. How does the brain support this flexibility? One potential mechanism  
4 for flexibly organizing large-scale neuronal activity is a traveling wave (TW), which is a neuronal  
5 oscillation that propagates across the cortex<sup>1,2</sup>. TWs are widespread in the brain, appearing across  
6 multiple regions in animals<sup>6–8</sup> and humans<sup>4,9,10</sup>, at both small<sup>11–14</sup> and large<sup>15–19</sup> scales. Because  
7 TWs correlate with local neuronal activity, their spatiotemporal organization indicates which cortical  
8 regions are active and where activity is propagating at each moment<sup>5,15</sup>. Further, due to TWs' ability  
9 to rapidly reorganize<sup>20</sup>, they may support the brain's ability to dynamically adapt its processes to  
10 meet changing environmental demands<sup>21,22</sup>. However, despite these theoretical features and TWs'  
11 widespread prevalence<sup>2,15</sup>, their behavioral importance is unknown. Thus, our goal here was to identify  
12 potential functional roles of TWs in human cognition.

13 Two key properties of TWs are their propagation direction and timing. As a TW propagates, it  
14 reflects a moving wave of rhythmic neuronal activity, which causes neurons across neighboring cortical  
15 regions to activate in different orders according to the direction of wave propagation<sup>9,23</sup>. Thus,  
16 a TW's direction of propagation may indicate the sequence of activity across neighboring cortical  
17 regions, with direction changes signaling a reorganization of the underlying neural connectivity and  
18 computation. In this way, separate neural processes and their associated behaviors might be reflected  
19 by TWs propagating in different directions<sup>24,25</sup>.

20 A complementary feature of a TW is its timing, measured via its phase. The instantaneous phase  
21 of a TW indicates the positions of the wave's peaks and troughs along the cortex. In earlier studies, the  
22 phase of neural oscillations in many regions correlated with the functional state of the local neuronal  
23 network<sup>26–30</sup>, with specific phases indicating different processing states, such as the level of sensitivity  
24 to new inputs<sup>5</sup>. Therefore, more generally, we hypothesized that as a TW propagates through a  
25 region of the human cortex, its instantaneous phase at a particular region would be informative about  
26 the state of local neuronal processing.

27 Together, via changes in direction and phase, TWs may provide a mechanism to flexibly organize  
28 large-scale brain activity to support different behavioral processes. We examined this hypothesis in the  
29 domain of human memory, by measuring human TWs directly from neurosurgical patients performing  
30 memory tasks. We found that the propagation direction and timing of the brain's ongoing TWs  
31 changed in relation to memory encoding and recall processes. These results demonstrate that different  
32 human cognitive processes are supported by large-scale patterns of oscillations that are TWs, with  
33 their propagation direction and timing indicating the reorganization of cortical interactions to support  
34 behavior.

## 35 Results

36 **Measuring traveling waves in the human cortex.** To examine how the direction and timing of  
37 traveling waves (TWs) in the human brain related to cognition, we examined electrocorticographic  
38 (ECoG) brain recordings from neurosurgical patients performing memory tasks. The dataset consisted  
39 of recordings from 68 subjects performing an episodic-memory task<sup>31</sup> and 77 patients performing a  
40 working-memory task<sup>32</sup>. During these tasks, subjects showed brain oscillations at various frequencies  
41 across widespread brain regions, consistent with earlier work<sup>31,33</sup>.

42 We analyzed these multichannel recordings using spectral analysis and circular statistics to identify  
43 the neural oscillations that behaved as TWs and assess their functional role<sup>4,34</sup>. A prerequisite for  
44 a brain region to show a TW is that there must be an oscillation at the same frequency across a

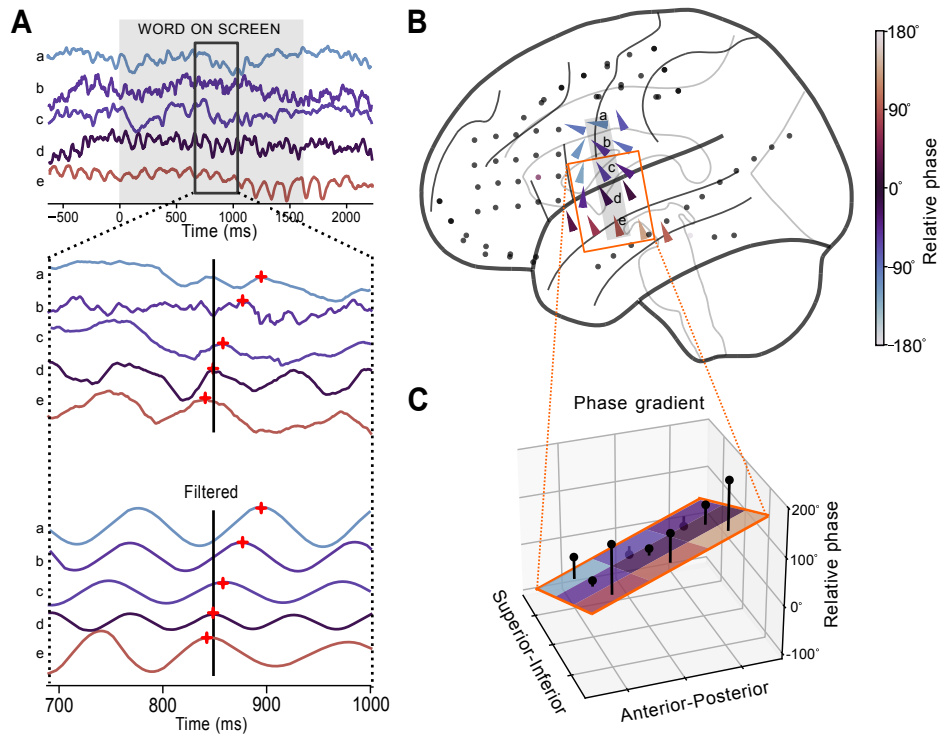

**Figure 1: Example traveling wave (TW) at 8.9 Hz in Patient 34's left hemisphere.** (A) Recording from one trial of the memory task. Top: raw signal from five selected electrodes. Middle: Expanded view of the signals from the top panel. Bottom: The signals from the middle panel after filtering at  $8.9 \pm 1.3$  Hz. Color indicates relative phase, measured at the time of the black line. (B) Brain map indicating the TW in this trial. Arrows indicate, for each electrode, the local propagation direction. Arrow color indicates relative phase at time indicated by black line in A. (C) Illustration of the circular-linear regression model for measuring the properties of each TW. This model estimates the spatial phase gradient at each electrode based on the phases from the nearby electrodes' filtered signals. Black dots indicate the measured phase on each electrode, the plane indicates the model fit, and black lines indicate residuals. The slope of the fitted surface provides an estimate of the TW's propagation direction and speed.

45 contiguous region of cortex. Thus, to identify TWs, in each patient we first identified the spatially  
46 contiguous clusters of five or more electrodes that simultaneously showed oscillations at similar fre-  
47 quencies, which we refer as "oscillation clusters." Next, we tested whether each oscillation cluster  
48 showed a TW by measuring whether the timing of these oscillations shifted progressively with the  
49 position of the electrode within the cluster. To statistically test each cluster for a TW, we measured  
50 the instantaneous phase of the oscillation at each electrode and identified consistent phase gradients  
51 across neighboring electrodes (see *Methods*). A phase gradient across an oscillation cluster indi-  
52 cates that a TW is present because it means that the cycles of one oscillation are appearing with a  
53 progressive delay across neighboring regions of cortex (Fig. 1).

54 As in earlier work<sup>4,35</sup>, TWs were widespread in these datasets. We observed significant oscillations  
55 and TWs across all brain lobes, in both hemispheres, at frequencies from 2 to 30 Hz. Overall, 72% of  
56 electrodes were part of at least one oscillation cluster (Tab. S1). 84% of oscillation clusters exhibited  
57 significant TWs (Figs. S1, S2). TWs were prominent during both the episodic and working memory  
58 tasks (in 59 of 68 subjects and 64 of 77 subjects, respectively; Tables S2, S3).

59 Figure 1A illustrates a TW at  $\sim 8.9$  Hz that appeared in one trial of the episodic memory task in  
60 a patient's left temporal and frontal cortices. This oscillation was a TW because its individual cycles

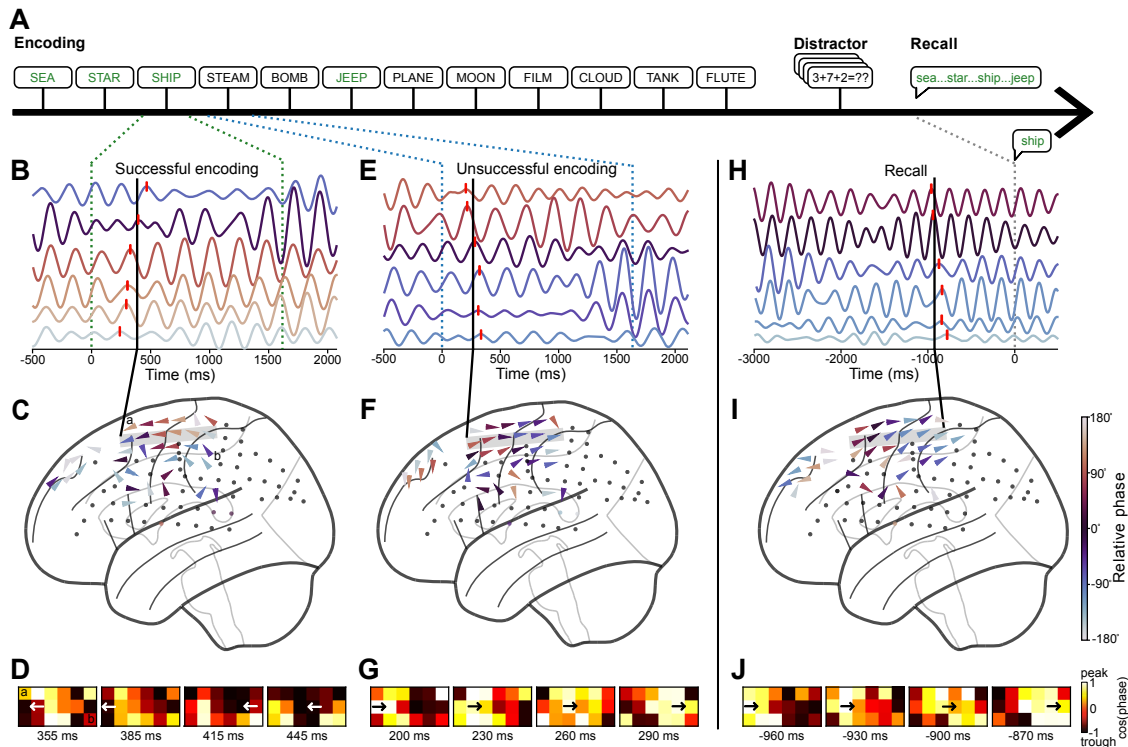

**Figure 2: Changes in traveling wave direction across memory encoding and recall.** (A) Timeline of one trial of the verbal memory task for patient 69. Words colored green were successfully encoded, black words were forgotten. (B) Recordings on six electrodes in one trial while the subject successfully encoded the word “SHIP”. Signals were filtered at 4.5 Hz and electrodes were ordered from anterior (top) to posterior (bottom). Red ticks indicate peaks of one oscillation cycle, which illustrates an example TW because there was a progressive shift in the timing of these peaks across electrodes. (C) Brain map with arrows showing the direction of TW propagation for the timepoint labeled with the black line in B. (D) Topography of this TW’s propagation across a  $3 \times 6$  array of electrodes within the oscillation cluster from panel C (Labels (a) and (b) indicate corresponding electrodes). Each panel indicates the topography of instantaneous phase at one of four sequential time points. (E–G) A representative TW measured during unsuccessful memory encoding where the subject viewed the word “STEAM”, with plots analogous to panels B–D. (H–J) A representative TW measured prior to the recall of the word “SHIP.”

61 appeared with a progressive delay across neighboring electrodes. Each cycle of this TW appeared  
 62 first on ventral electrodes, and then later on anterior–superior electrodes, propagating with a speed  
 63 of  $\sim 1$  m/s. Although the TWs on this cluster varied over time, across trials the propagation of TWs  
 64 here most often in an anterior–superior direction (Fig. 1B). We measured the propagation of TWs  
 65 throughout the task using circular statistics (Fig. 1C), which revealed the instantaneous direction,  
 66 phase, speed, and strength (spatial consistency of the phase gradient). We then tested these features  
 67 for links to behavior (see *Methods*).

68 To identify features of TWs that correlated with separate cognitive processes, we examined record-  
 69 ings from an episodic memory task, which previously had revealed brain signals distinguishing distinct  
 70 stages of memory<sup>33,36</sup>. In each list in this task, subjects viewed a sequence of words and, after a  
 71 delay, tried to freely recall as many of them as possible (Fig. 2A). On average, subjects successfully  
 72 recalled 27% of viewed words. Because subjects only remembered a subset of the words in the task, it  
 73 provided data for us to test whether features of TWs differed according to whether memory encoding  
 74 was successful.

75 Figure 2B–J shows data from an oscillation cluster in the frontal lobe of patient 69 with TWs  
76 at  $\sim 4.5$  Hz during memory encoding and recall. In one trial when the subject viewed a word that  
77 they successfully encoded into memory, the electrodes in this cluster showed a TW that propagated  
78 in a posterior-to-anterior direction (Fig. 2B–D). Inversely, later in that same list when the subject  
79 viewed a different word that they did not successfully encode, there was instead a TW propagating  
80 in the opposite, anterior-to-posterior direction (Fig. 2E–G, see also Videos S1, S2). Finally, during  
81 recall, before the subject said the name of the remembered word, this oscillation cluster showed a TW  
82 propagating in an anterior-to-posterior direction (Fig. 2H–J). This pattern of results—in which the  
83 direction of TW propagation shifted according to the current memory process and performance—led  
84 us to systematically test the link between different memory processes and TW propagation direction.

85 **Traveling waves propagate anteriorly during successful memory encoding.** We examined the  
86 link between TW propagation direction and memory encoding by comparing the properties of the  
87 TWs that appeared during the presentations of words that were remembered versus those that were  
88 forgotten. A representative example of our results is shown in Figure 3A,B for the same oscillation  
89 cluster shown above. Here, when the subject viewed words that they successfully encoded into mem-  
90 ory, theta TWs propagated in a posterior-to-anterior direction ( $p < 10^{-4}$ , Rayleigh test). When the  
91 subject viewed words they did not successfully remember, the TWs here propagated bidirectionally,  
92 in a posterior-to-anterior direction on some trials and in an anterior-to-posterior direction on other  
93 trials (Fig. 3B, middle). Thus, there was a significant difference in the directions of TW propagation  
94 between successful and unsuccessful encoding, with unidirectional posterior-to-anterior propagation  
95 for successful memory encoding and bidirectional propagation for unsuccessful encoding (Fig. 3B,  
96  $p < 10^{-3}$ , Watson–Williams test). Overall, it was common for clusters to exhibit TWs that propa-  
97 gated bidirectionally (60% of all clusters), by switching over time between propagation in two distinct  
98 directions (Figs. S3, S4A, S5; see *Methods*). Overall, subjects who showed bidirectional TW propa-  
99 gation showed a 23% higher rate of successful memory encoding compared to subjects without this  
100 pattern (Fig. S4B), indicating that bidirectional TW propagation is a feature of normal cognition.

101 We next examined across the entire dataset whether TW propagation direction correlated with  
102 memory encoding. We identified the oscillation clusters with bidirectional TW propagation and mea-  
103 sured each cluster’s “preferred direction,” which is the propagation direction that was most closely  
104 associated with successful memory encoding (Fig. 3C, see *Methods*). We then labeled each timepoint  
105 of each trial according to whether the TWs were propagating in the cluster’s preferred or anti-preferred  
106 direction. Then, using permutation statistics, we tested the link between propagation direction and  
107 whether the subject successfully encoded the viewed word at each timepoint. Using this procedure, in  
108 Patient 69 we found a reliable link between memory encoding and TW direction that was strongest  
109 160 ms after word presentation (Fig. 3D;  $p < 0.05$ , cluster-based correction for multiple compari-  
110 sons). At this timepoint, when this cluster showed a TW propagating in the preferred direction (i.e.,  
111 posterior-to-anterior), the subject was  $2.2\times$  more likely to remember the word successfully than when  
112 the TW was propagating in the anti-preferred direction (35% versus 17% respectively;  $p < 0.01$ ,  
113 binomial test, Fig. 3D). Other subjects also showed similar patterns, with significantly better memory  
114 encoding when TWs propagated in the preferred direction (Figs. 3F–J, S6).

115 Consistent with these examples, overall the preferred directions for TWs on individual oscillation  
116 clusters were most often posterior-to-anterior (Fig. 4A, top left,  $p < 0.05$ , Rayleigh test). In contrast,  
117 propagation directions for unsuccessful memory encoding shifted and showed increases in anti-preferred  
118 and bidirectional propagation (Fig. 4A, top right), which was significantly different compared to the  
119 distribution of directions during successful encoding ( $p < 0.05$ , Watson–Williams test).

120 Overall, memory-related TWs were widespread. Of the oscillation clusters that showed bidirectional

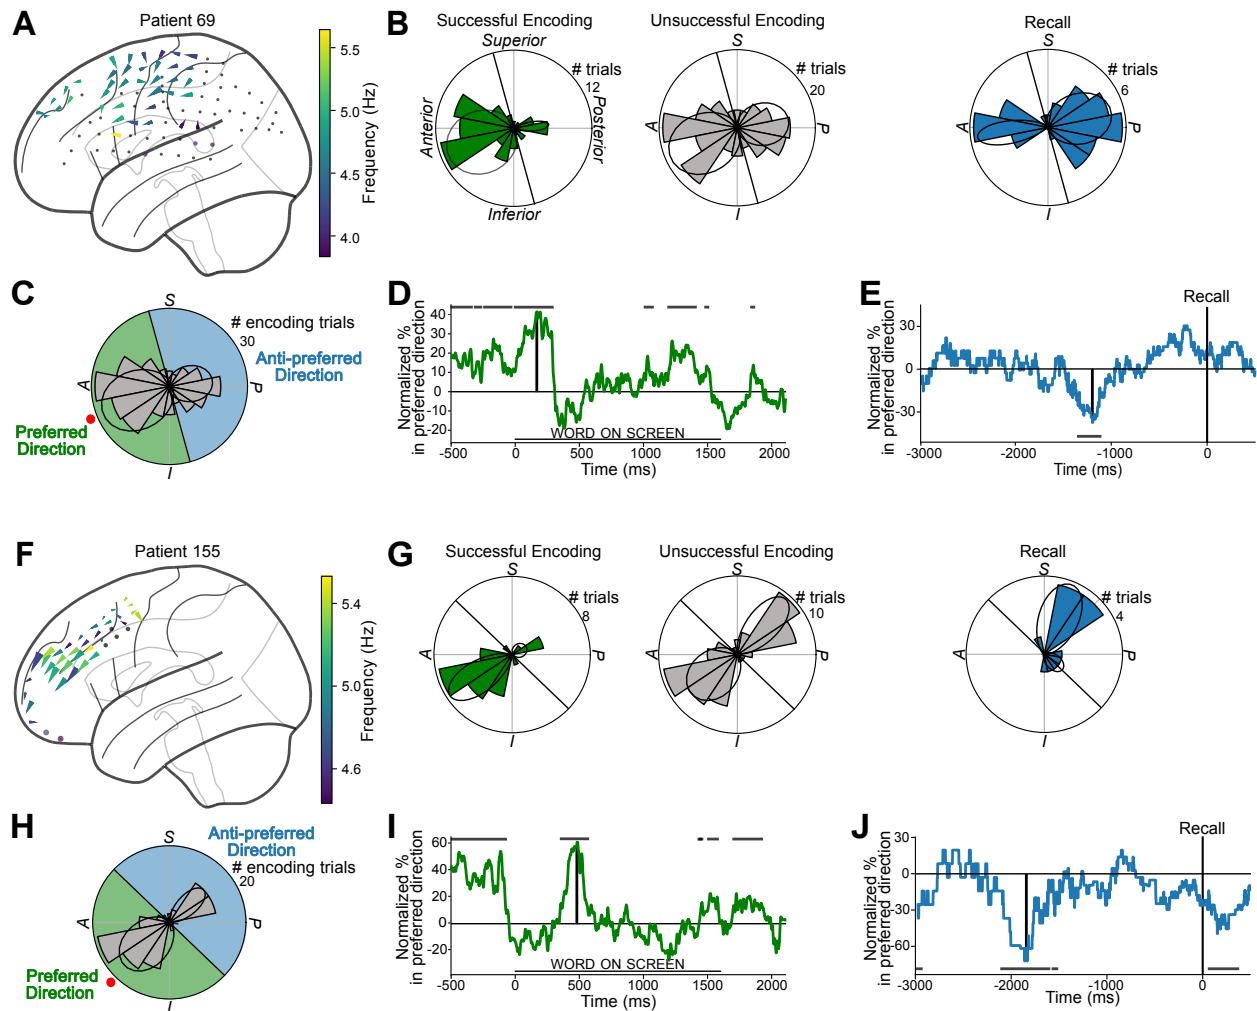

**Figure 3: Traveling waves (TWs) vary propagation direction with memory processing.** (A) Brain map showing the mean direction and frequencies of TWs measured in the left hemisphere of patient 69 during successful memory encoding. Arrows indicate the mean propagation direction for each electrode averaged across trials. Arrow size indicates directional consistency. (B) Distribution of TW propagation directions across trials, averaged across the electrodes from panel A, during successful memory encoding (left), unsuccessful encoding (middle), and recall (right). Predominant directional clusters indicated by black ellipses (see Methods). (C) Propagation directions of TWs across all encoding trials. The preferred direction is marked with a red dot; green and blue shading indicate the range of angles labeled as preferred and anti-preferred directions, respectively. (D) Timecourse of the link between TW propagation direction and memory encoding. Line indicates the difference in the percentages of TWs moving in the preferred direction between trials with successful memory encoding compared to unsuccessful encoding. Vertical black line indicates the time of the maximal difference, which corresponds panels A–C. Horizontal black lines indicate timepoints when directional shifts are statistically significant (permutation test,  $p < 0.05$ ). (E) The link between TW propagation direction and memory recall. The line indicates the normalized percentage of trials propagating in the preferred direction prior to memory recall at time 0. Values are normalized relative to the cluster’s baseline period. Vertical black line indicates the timepoint of the peak anti-preferred propagation (which matches the right panel of B). Horizontal black lines indicate significant timepoints measured by binomial tests. (F–J) Same as A–E for patient 155.

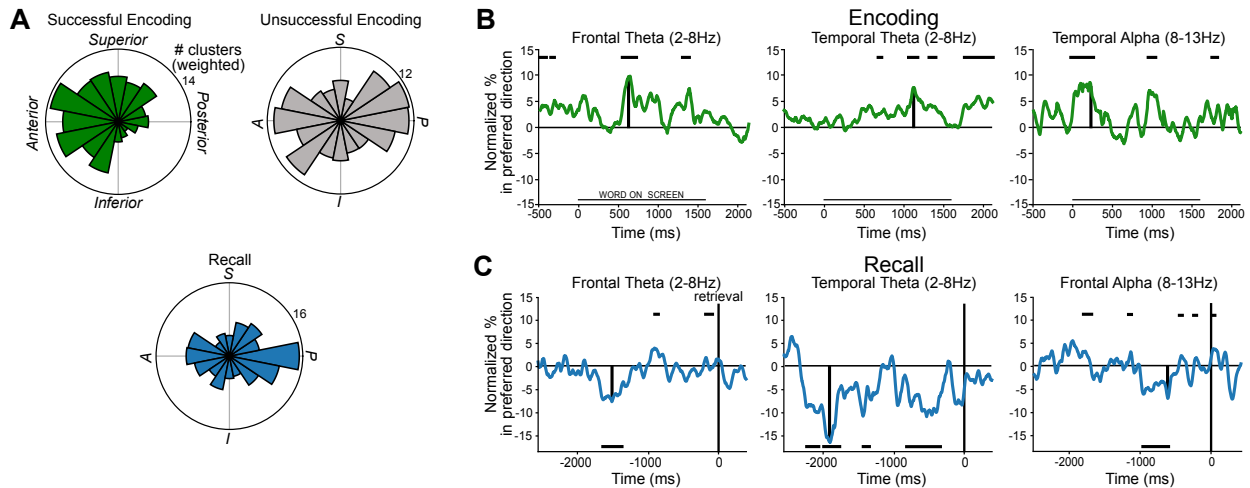

**Figure 4: Population analysis of traveling-wave (TW) direction shifts during memory encoding and recall.** (A) Distribution of clusters' predominant propagation directions for TWs across all regions and frequencies during memory encoding and recall. (B) Timecourses of TW directional shifts during successful and unsuccessful memory encoding. Black vertical lines indicate timepoint of peak propagation in the preferred direction. Horizontal black line indicates statistical significance at  $p < 0.05$  based on permutation testing, with the position at top or bottom of the plot indicating the direction of the effect. (C) Timecourses of TW directional shifts prior to memory recall. Black vertical lines indicate times of peak anti-preferred propagation.

121 propagation, 69% exhibited a preferred direction that was significantly associated with successful  
 122 memory encoding ( $p$ 's  $< 0.05$ , FDR-corrected binomial tests: see Methods; Fig. S7, Table S1). This  
 123 link between memory performance and the direction of TW propagation was present at significant  
 124 levels in the theta band (2–8 Hz) in the frontal and temporal lobes and in the alpha band (8–13 Hz)  
 125 in the temporal lobe ( $p$ 's  $< 0.05$ , binomial tests).

126 For alpha-band TWs in the temporal lobe, propagation direction significantly correlated with mem-  
 127 ory encoding even before the word was presented, beginning 24 ms before word presentation and  
 128 peaking 229 ms after word presentation ( $p < 0.05$ , cluster-based permutation test, see Methods, Fig.  
 129 4B, right). At this peak timepoint, subjects showed 1.4× greater memory encoding performance when  
 130 TWs propagated in the cluster's preferred direction. Similarly, frontal and temporal-lobe theta-band  
 131 TWs showed increased propagation in the preferred direction ~600–1200 ms after word presentation  
 132 (Fig. 4B, left and middle), and this effect predicted ~1.8× and ~1.4× increases in the rate of memory  
 133 encoding success, respectively ( $p < 10^{-3}$  and  $p < 0.05$ , permutation tests).

134 We considered the possibility that this correlation with memory could be more strongly driven by  
 135 other features of TWs, such as the power of ongoing oscillations, rather than propagation direction  
 136 specifically. However, we neither found a significant relation between memory encoding and the power  
 137 of ongoing oscillations nor with the speed or strength of TWs (all  $p$ 's  $> 0.05$ ; Tab. S4, Fig. S8). Thus,  
 138 our results indicate that the link between TWs and memory encoding was specific to the direction of  
 139 propagation.

140 **Traveling waves propagate posteriorly during memory recall.** Immediately before the subject  
 141 verbally recalls each word, they are actively searching their memory<sup>36,37</sup>. We hypothesized that a  
 142 different pattern of TWs would be present during this period. To examine the propagation of TWs  
 143 during memory recall, we examined the same cluster of electrodes (patient 69) during the period prior  
 144 to the patient speaking aloud the remembered item (Fig. 3E). Here, rather than the posterior-to-



145 anterior propagation that appeared during encoding, instead TWs tended to propagate in the cluster's  
146 anti-preferred, or anterior-to-posterior, direction (Fig. 3B, right). This cluster's propagation direction  
147 during recall was reliably different compared to successful encoding ( $p < 0.05$ , Kuiper test) and was  
148 strongest  $-1195$  ms prior to word recall (Figs. 3E). Thus, the direction of TW propagation on this  
149 cluster correlated with the current memory process, switching directions between successful encoding  
150 and recall. TWs in other subjects also showed similar patterns (Figs. 3F–J, S6).

151 Across the dataset, TWs on 40% of the oscillation clusters with bidirectional propagation exhibited  
152 a significant pre-recall direction shift. This usually involved increased anterior-to-posterior propagation  
153 prior to recall (Fig 4A, bottom,  $p < 0.01$ , Rayleigh test). Pre-recall direction shifts occurred at  
154 significant levels for theta-band TWs in the frontal (7%) and temporal lobes (15%) and for alpha-  
155 band TWs in the frontal lobe (7%) (Fig. 4C; all  $p$ 's  $< 0.05$  FDR corrected, binomial tests; Fig. S7,  
156 Table S1). Thus, memory recall is associated with theta- and alpha-band TWs in the temporal and  
157 frontal lobes that propagate in an anterior-to-posterior direction, which is the opposite direction from  
158 memory encoding.

159 **Traveling wave phase predicts the timing of memory retrieval.** In addition to propagation di-  
160 rection, another key characteristic of a TW is phase, which indicates the current location on the  
161 cortex of the TW's peaks and troughs. We thought that the phase of TWs might be relevant for  
162 memory because empirical studies showed that the phase of neuronal oscillations predicted perception  
163 and attention<sup>5,26–30</sup> and models described how certain items were represented in memory at specific  
164 oscillation phases<sup>38,39</sup>. Building upon this, we hypothesized that the phase of TWs would be infor-  
165 mative about the brain's current state by indicating the specific areas of cortex that most actively  
166 support memory retrieval at each moment. The phase of the TW at each location cycles rapidly as  
167 the oscillation propagates across the brain. Therefore, to test if TW phase was relevant functionally,  
168 we needed a behavioral measure that would be sensitive to the timing of neural processes.

169 To examine this issue, we examined subjects' reaction times as they performed the Sternberg  
170 working-memory task, which is a paradigm that elicits reliable response timing patterns<sup>32</sup>. We then  
171 tested for a relation between TW phase and memory retrieval by comparing each subject's reaction  
172 times between trials when memory cues were presented at different phases of ongoing TWs. Our  
173 main hypothesis was that the subject's reaction time during retrieval would vary according to the  
174 instantaneous phase of a cluster's TW when the memory cue was presented.

175 In each trial of this task, subjects viewed a list of to-be-remembered items, followed by a retrieval  
176 cue. They responded by pressing a button to indicate whether the cue was present in the just-  
177 presented list (Fig. 5A, see *Methods*). We measured the instantaneous phase of TWs while they  
178 were responding to each cue and tested for a correlation between the phase at each moment and the  
179 subject's subsequent reaction time.

180 The TWs on many oscillation clusters showed a significant correlation between the phase when  
181 an item was presented and the subject's reaction time. An example of this pattern is shown in Figure  
182 5, which shows data from an oscillation cluster where TWs often propagated in a dorsal-to-ventral  
183 direction at 12.5 Hz across the right hemisphere (Fig. 5B). Figure 5C plots the mean reaction time  
184 of this subject as a function of the instantaneous phase of this TW in the temporal lobe when the  
185 item was presented (see also Supp. Video S3. The subject responded fastest ( $\sim 840$  ms) on trials  
186 when the memory cue was presented while the peak of the TW was positioned in the temporal lobe  
187 (and, accordingly, when the TW trough was in the parietal lobe). Inversely, the subject responded  
188 more slowly ( $\sim 975$  ms) when the cue was presented while the TW had the opposite phase (i.e., when  
189 the TW's peak and trough phases were located in the parietal and temporal lobes, respectively). This  
190 link between the TW phase and efficiency of memory retrieval was robust, as  $\sim 30\%$  electrodes in this

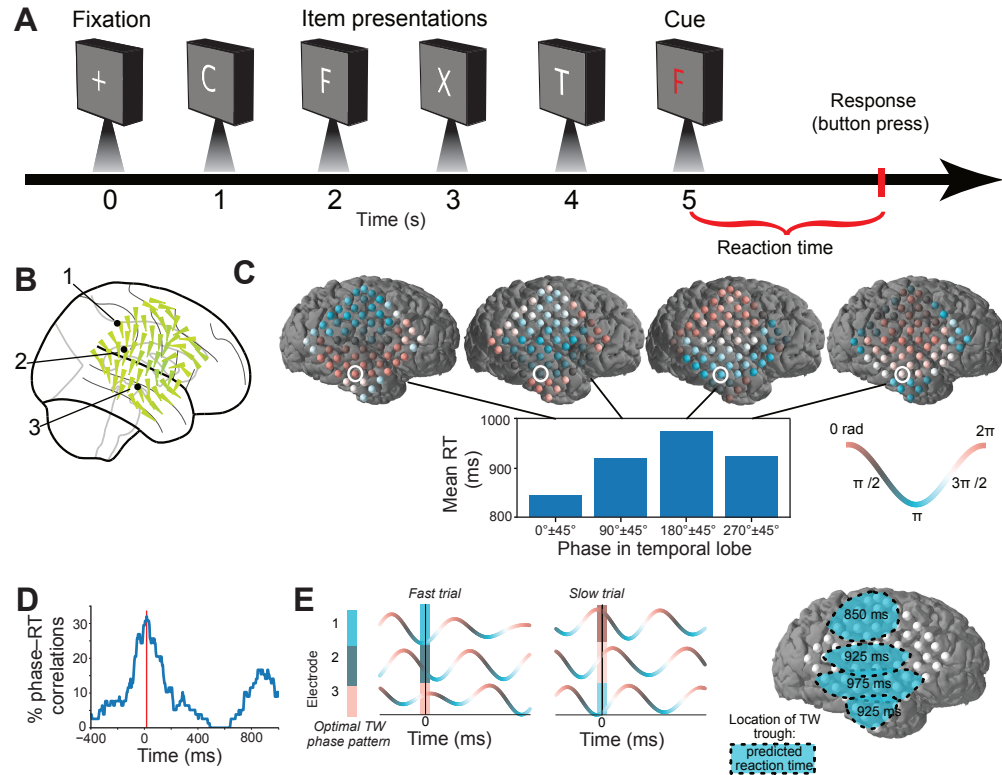

**Figure 5: Relation between traveling wave (TW) phase and reaction time in one oscillation cluster.** (A) Timeline of one trial of the working-memory task. (B) Brain map of a 12.5-Hz TW in subject 72, with arrows indicating mean propagation direction across trials. (C) Illustration of the link between TW phase and reaction time. Bar chart indicates the mean reaction time computed as a function of the instantaneous TW phase at the moment of cue presentation, as measured on electrode #3 (white circle). Brain plots indicate the topography each of four  $\pm 45^\circ$  phase patterns where electrode color indicates the mean phase. (D) The percentage of electrodes in this cluster showing a significant correlation between TW phase and reaction time for each timepoint relative to cue presentation ( $t = 0$ ). Red line indicates timepoint of peak correlation. (E) Schematics illustrating how fast and slow reactions correlated with different TW phase patterns at the moment of stimulus presentation. The phase patterns for fast and slow reactions are shown across three example electrodes in the left panel. Analogously, in the right panel each ellipse indicates how the subject's reaction time shifts with the position of the TW trough at cue presentation.

191 cluster showed a significant correlation between the TW phase at cue presentation and the subsequent  
 192 reaction time ( $p's < 0.05$ , circular-linear correlation; Fig. 5D). Thus, during memory retrieval this  
 193 subject's reaction time varied with the instantaneous phase of ongoing TWs in the right temporo-  
 194 parietal cortex, with fastest responses occurring if the cue was presented when the peak phase of the  
 195 TW was in the temporal lobe (Fig. 5E,F).

196 Other subjects also showed similar patterns, by exhibiting significant links between reaction time  
 197 in memory retrieval and the phases of ongoing TWs in the alpha band (Figs. 6). Across our dataset,  
 198 we found a significant link between TW phase and memory retrieval in 23% of all clusters with TWs,  
 199 including oscillations in both the theta (26%) and alpha (20%) bands ( $p's < 0.05$ , binomial tests).  
 200 Together, these results suggest a role for the phase of cortical TWs in coordinating the timing of  
 201 memory retrieval.

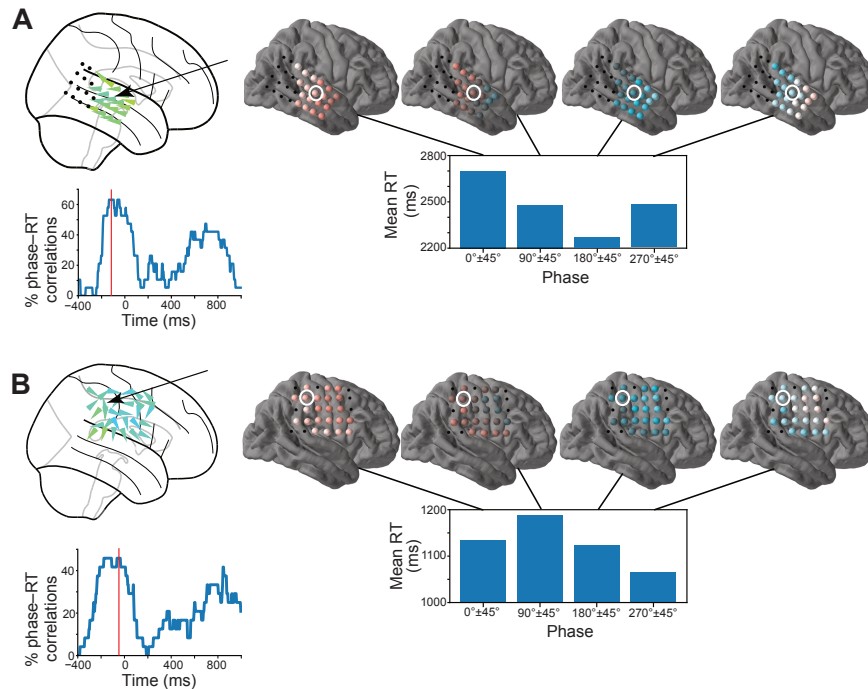

**Figure 6: Oscillation clusters showing links between TW phase and reaction time. (A)** Oscillation cluster showing a 10-Hz TW in subject 73. Red line indicates the timepoint of the peak correlation between TW phase and reaction time. Brain maps following format of Fig. 5. **(B)** Oscillation cluster in subject 46 with a 9.5-Hz TW that exhibited a significant correlation between phase and reaction time that peaked ~80 ms before cue presentation.

202 **Timecourse of the link between TW phase and memory retrieval.** In the examples shown above,  
203 for alpha-band oscillations the correlation between TW phase and reaction time was strongest at the  
204 moment when the memory cue was presented. This suggests that the functional role of TW phase in  
205 memory retrieval relates to early-stage processes. We next measured the timing of the link between  
206 TW phase and reaction time across the dataset. For each electrode in a cluster showing reliable  
207 TWs with unidirectional propagation during working memory retrieval, we measured the correlation  
208 between reaction time and TW phase throughout cue presentation. We then measured the timepoint  
209 of the peak correlation for each cluster. Consistent with the examples shown above, alpha-band TWs  
210 generally showed the strongest correlations between phase and reaction time prior to cue presentation  
211 (Fig. 7A). This result indicates that the phase of alpha-band TWs correlates with early stages of cue  
212 processing.

213 In addition to alpha-band TWs, we also found that slower, theta-band TWs showed significant  
214 correlations between phase and reaction time. However, this effect occurred ~600 ms after cue  
215 presentation (Fig. 7B), which is significantly later than the timing of the effect for alpha-band TWs  
216 ( $p < 10^{-3}$ , rank-sum test). This timing shift suggests that alpha- and theta-band TWs have different  
217 functional roles in memory, supporting early and late-stage processes, respectively.

## 218 Discussion

219 A persistent question over the past decades has been how widespread areas of the brain organize their  
220 interactions to support different behaviors. TWs provide one answer to this question by propagating in

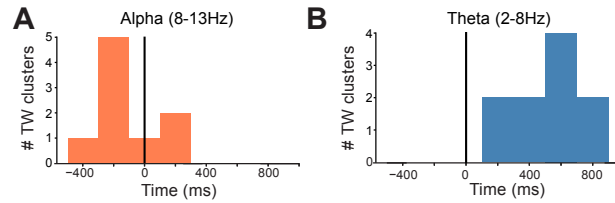

**Figure 7: Timecourse of the peak correlation between phase and reaction time for traveling waves at different frequencies. (A)** For traveling waves in the alpha frequency band (8–13 Hz), histogram shows the timing of the peak link between TW phase and reaction time, time measured relative to cue presentation at 0 ms. **(B)** Same as A for TWs at theta frequencies (2–8 Hz).

221 particular directions across the brain to coordinate neuronal activity with high temporal precision. Here  
222 we found that the TW direction and timing correlate with memory encoding and recall, which suggests  
223 that propagating neural oscillations support cognition by organizing the spatiotemporal structure of  
224 neural activity.

225 Prior studies showed that the theta and alpha oscillations that comprise TWs are phase locked  
226 to neuronal spiking and high-frequency oscillations via the phenomenon of phase–amplitude cou-  
227 pling<sup>9,40,41</sup>. With our findings, this suggests that the propagation of theta and alpha oscillations  
228 across the brain as TWs indicates when and where the brain is exhibiting discrete pulses, or “pack-  
229 ets,” of neuronal activity moving across the cortex<sup>42</sup>. Thus, the propagation direction and phase of  
230 theta and alpha TWs may reveal the sequence and timing of when neural representations are commu-  
231 nicated across brain regions. These findings have fundamental implications for explaining how different  
232 brain regions represent information and interact to support behavior<sup>43</sup>. Our findings also have trans-  
233 lational and clinical applications because they suggest that measuring TWs could improve our ability  
234 to interface with the brain and diagnose neurological disorders.

235 A key aspect of our results is identifying a link between distinct directions of TW propagation and  
236 separate functional processes, in particular memory encoding and recall. In conjunction with earlier  
237 research<sup>25,44,45</sup>, this suggests that a fundamental way in which the brain’s functional connectivity  
238 transiently reorganizes is by changing the directional interactions between different brain regions.  
239 Because posterior-to-anterior TWs were associated with successful memory encoding and anterior-to-  
240 posterior TWs were associated with memory recall (Fig. 8A), it suggests that forming new episodic  
241 memories involves the flow of neural activity from posterior regions into the frontal lobe<sup>46</sup>, while  
242 retrieval involves the flow of neural activity in the opposite direction<sup>47,48</sup>.

243 One more general possibility is that posterior-to-anterior TWs correspond to feedforward pro-  
244 cessing while anterior-to-posterior TWs correspond to feedback processing<sup>49–53</sup>. This interpretation  
245 is also consistent with earlier work showing that different patterns of neuronal oscillations modulate  
246 feedforward networks during visual perception<sup>51,54</sup> and as well as feedback processing during top-down  
247 control and prediction<sup>55</sup>. Consistent with our results, there is also other evidence of neural activity  
248 changing direction for specific functional states<sup>25,44,56–60</sup>, thus suggesting that our results are part of  
249 a broader phenomenon.

250 An important question going forward is to understand the mechanisms underlying cortical TWs and,  
251 in particular, how TW propagation may shift to support different behaviors. Some work suggests that  
252 TWs in the cortex are driven by underlying corticothalamic networks<sup>61,62</sup> (but see Halgren et al.<sup>63</sup>).  
253 Thus, one potential mechanism by which the direction of TW propagation could change is by local  
254 increases in excitation at certain thalamic subregions. This excitation could accelerate the frequency of  
255 cortical oscillations<sup>20</sup> and alter TW propagation direction, as predicted by coupled-oscillator models of

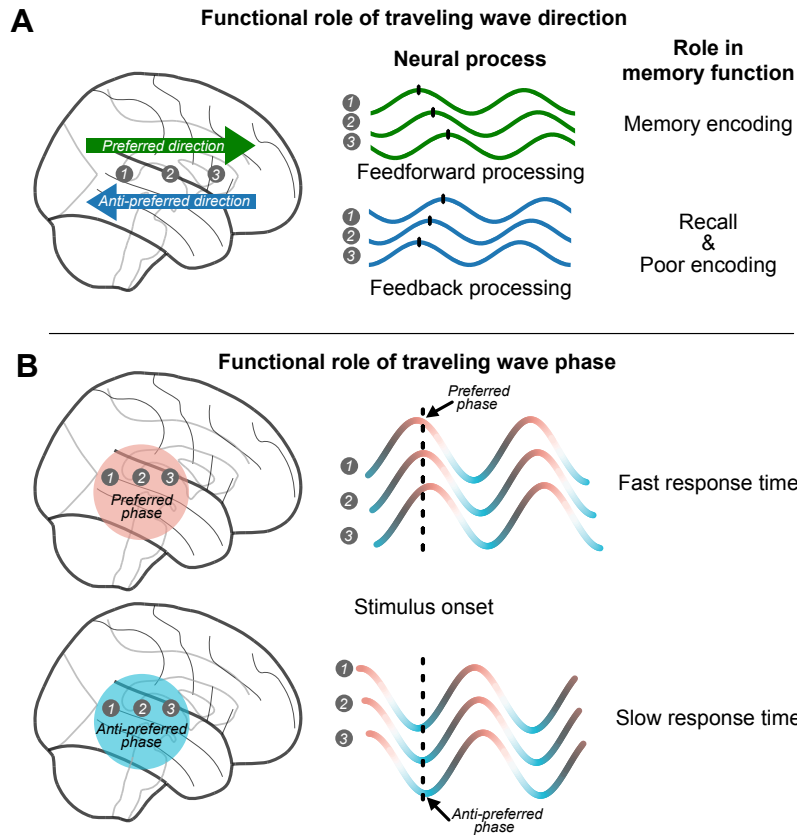

**Figure 8: Hypothesized relations between traveling wave (TW) features and memory processes. (A)** When presented with a list of words during an episodic memory task, successful memory encoding more likely when waves propagated in the preferred direction, as opposed to the anti-preferred direction. We hypothesize that preferred and anti-preferred TW propagation may reflect more general neural processes including feedforward and feedback cortical processing, respectively. **(B)** During the retrieval portion of the working-memory task, subjects responded more quickly to memory cues that were presented when the preferred phase of a TW was in a particular region. This suggests that a TW's phase at each moment indicates whether the brain is primed for memory processing.

256 TWs<sup>1,4,64</sup>. Computational models of TWs could thus be useful for assessing the potential mechanisms  
 257 underlying memory-related direction shifts.

258 A TW propagating in a particular direction may indicate that a region is uniquely engaged in a  
 259 particular functional process. However, a further possibility is that the neural networks in individual  
 260 regions simultaneously support multiple directionally organized processes, such as concurrent feedback  
 261 and feedforward processing<sup>50</sup>. Following this view, the propagation direction of TWs at each moment  
 262 may be informative about the current weighting, or attention, given to each process. Consistent  
 263 with this idea, prior work demonstrated a link between the amplitude of neuronal oscillations and the  
 264 attention given to specific neuronal representations<sup>65,66</sup>. In the context of our results, the presence of  
 265 posterior-to-anterior TWs during successful memory encoding may indicate that the brain is currently  
 266 attending to feedforward processing to represent the current stimulus and transfer it to memory (Fig.  
 267 8A). Inversely, the bidirectional patterns during unsuccessful encoding may indicate that feedforward  
 268 processes were attended more weakly<sup>67</sup>. Following this logic, the increases in anterior-to-posterior  
 269 TWs before recall may correlate with top-down processing related to memory search<sup>47,48</sup>.

270 Our findings suggest that many TWs linked to behavior are endogenous and ongoing in the brain,

271 rather than being evoked by task events. This is most notable for alpha-band TWs, whose direction  
272 and phase correlated with performance before stimulus presentation in both encoding and retrieval,  
273 indicating that the oscillations were present prior to stimulus onset. This heightened relevance of  
274 alpha-band TWs prior to stimulus onset indicates their role in priming relevant brain regions to be in  
275 an optimal state for an upcoming visual stimulus<sup>26,27,29,68–70</sup>. In contrast to our alpha-band results  
276 at early timepoints, it is notable that we found that theta-band TWs correlated with behavior at later  
277 timepoints because it suggests that theta TWs have a fundamentally different functional role<sup>60,71–73</sup>.

278 In addition to propagation direction, we found that the timing of TW propagation over specific  
279 regions was predictive of the speed of memory retrieval. This finding may improve our understanding  
280 of earlier studies that showed functional roles for specific phases of ongoing neuronal oscillations<sup>74,75</sup>,  
281 with the propagation of TWs perhaps reflecting moving “packets” of cortical activity to support  
282 memory encoding<sup>42,76</sup>. Our results are also consistent with the classic hypothesis that a fundamental  
283 function of alpha oscillations is to perform a “scan” for relevant behavioral information<sup>77</sup>. This theory  
284 suggested that TWs play a role in the neural basis of attention, with the phase of a TW indicating the  
285 specific region of cortex that is preferentially attended at each moment during perception (Fig. 8B).  
286 Our findings, with recent work<sup>5</sup>, generally support this TW scanning theory, and our work suggests  
287 that this same mechanism may be relevant more broadly to memory<sup>68,78,79</sup>.

288 It might be considered surprising that some of our results were not observed previously, given that  
289 human brain oscillations have been measured for decades. It is possible that many previous studies that  
290 reported direction- and phase-like patterns in a range of behaviors were actually related to TWs<sup>72,80–82</sup>.  
291 Our results relied on new analytical methods, which may have been essential for our findings. In  
292 particular, one challenging aspect of measuring TWs in humans is that there is substantial variation  
293 in oscillation frequencies and propagation directions across subjects and brain regions. Our analysis  
294 framework accommodated this diversity by measuring each subject’s TWs in a customized manner  
295 rather than assuming identical propagation and frequencies across all subjects. Given that we observed  
296 substantial variability across individuals, it emphasizes the importance of analyzing human brain data in  
297 a manner that accounts for intersubject differences in electrophysiology<sup>83–85</sup>. In light of the analytical  
298 challenges of measuring TWs in humans and the hints of similar patterns in prior literature, it suggests  
299 that TWs may actually have a much broader role in behavior and cognition than previously appreciated.

300 Traveling waves may be useful for practical purposes, beyond fundamental research. For brain–  
301 computer interfacing, TWs might be a useful neural signal for more effectively decoding the brain’s  
302 current state. In particular, our direction results indicate that measuring TW propagation can indicate  
303 whether the current brain state is well suited for memory encoding. Going forward, it may be possible  
304 to use TWs to measure more advanced aspects of cognition, perhaps with the use of improved  
305 recording methods, including high-density neural recording arrays<sup>44,86,87</sup>, as well as with noninvasive  
306 methods<sup>16,88,89</sup>. Further, TWs could provide biomarkers for identifying neurological disorders related  
307 to abnormal neural connectivity such as autism<sup>90</sup> or epilepsy<sup>91</sup>. Thus, characterizing the directional  
308 propagation of TWs holds the potential for new approaches for brain–computer interfacing and disease  
309 diagnosis by revealing when the brain’s current communication state is abnormal. TWs may also be  
310 useful for guiding the clinical use of brain stimulation, by providing a new target biomarker that reflects  
311 neural connectivity.

## 312 **Methods**

313 **Participants.** The 145 subjects who contributed data to our study were pharmaco-resistant epilepsy  
314 patients surgically implanted with grids and strips of electrodes on the surface of their cortex for the  
315 purpose of identifying epileptogenic regions. The patients’ clinical teams determined electrode place-

316 ment to best monitor each patient's epilepsy. 68 patients performed an episodic-memory task, and 77  
317 patients performed a working-memory task. Data for the episodic memory task were collected at 8  
318 hospitals: Thomas Jefferson University Hospital (Philadelphia, PA); University of Texas Southwestern  
319 Medical Center (Dallas, TX); Emory University Hospital (Atlanta, GA); Dartmouth–Hitchcock Medi-  
320 cal Center (Lebanon, NH); Hospital of the University of Pennsylvania (Philadelphia, PA); Mayo Clinic  
321 (Rochester, MN); National Institutes of Health (Bethesda, MD); and Columbia University Hospital  
322 (New York, NY). Data for the working-memory task were collected at 4 hospitals: Thomas Jeffer-  
323 son University Hospital (Philadelphia, PA); University of Pennsylvania Hospital (Philadelphia, PA);  
324 Children's Hospital of Philadelphia (Philadelphia, PA), and University Hospital Freiburg (Freiburg, Ger-  
325 many). Following approved institutional-review-board protocols at each hospital, all patients provided  
326 informed consent.

327 **Verbal Memory Task.** In the episodic memory task, subjects performed a verbal free recall  
328 paradigm<sup>31</sup>, in which they were asked to memorize a list of 12 words sequentially presented as text  
329 on the computer screen. Figure 2A presents the timeline of an example list. Each word was presented  
330 for 1600 ms, followed by a blank screen for 750–1000 ms. Lists consisted of high-frequency nouns  
331 ([http://memory.psych.upenn.edu/Word\\_Pools](http://memory.psych.upenn.edu/Word_Pools)). Following the list, the subjects were presented  
332 with a 20-s math distractor task prior to recall. During recall, subjects were given 30 s to verbally  
333 recall the words in any order. We recorded the verbal responses on a microphone and then manually  
334 scored the recordings after the task.

335 **Working memory task.** Patients performed the Sternberg working memory task<sup>32</sup>. Each trial of the  
336 task consisted of two phases. First, during memory encoding, patients were first shown a fixation cross  
337 for 1 second with a jitter of  $\pm 100$  ms followed by a list of 4 items, each presented for 700 ms seconds  
338 with a 275–350-ms interstimulus interval. The lists were composed of only consonants to prevent  
339 patients using mnemonic strategies such as creating sequences of letters that sound like words. Next,  
340 during the memory retrieval portion of each trial, viewed a memory probe item and were instructed  
341 to press a key to indicate whether the item was present on the list. The task then indicated whether  
342 the patient had responded correctly. Patients performed this task with a mean accuracy of 90% and  
343 a median reaction time of 1.16 s.

344 **Electrocorticographic brain recordings and referencing.** During the tasks, data was recorded at  
345 500, 1000, or 1600 Hz using a clinical intracranial electroencephalographic recording system at each  
346 hospital (Nihon Kohden EEG-1200, Natus XLTek EMU 128, Natus Quantum EEG, or Grass Aura-  
347 LTM64 systems). Subdural grid and strip electrodes had a distance of 10 mm between contacts. Each  
348 electrode's signal was initially referenced to a common contact placed intracranially, on the scalp, or  
349 on the mastoid process. We filtered electrical line noise using a 4<sup>th</sup>-order Butterworth notch filter at  
350 58–62 Hz (USA hospitals) or 48–52 Hz (Freiburg). We identified the location of each electrode by  
351 co-registering a structural magnetic resonance image (MRI) taken prior to surgery with a computed  
352 tomography (CT) image after electrodes were surgically implanted in order to compute electrode  
353 locations in standardized Talairach coordinates<sup>92</sup>.

354 **Identifying traveling waves.** We defined a traveling wave (TW) as a single oscillation at one fre-  
355 quency that appears across a region of cortex with a progressive phase shift. To identify TWs in our  
356 data, first we used an algorithm to identify spatially clustered groups of electrodes, "oscillation clus-  
357 ters," that showed oscillations at approximately the same frequency. We then measured whether the

358 phase across these clusters showed the progressive phase shift that characterizes traveling waves<sup>4</sup>. To  
359 find these oscillation clusters, we first identified the groups of at least 5 neighboring surface electrodes  
360 that showed narrowband oscillations within a 2-Hz window, while being within 25 mm of at least one  
361 other electrode with a similar frequency peak. We found the frequency of these narrowband oscillations  
362 on each electrode individually by identifying peaks in the power spectrum, which we measured at  
363 200 frequencies logarithmically spaced from 2 to 40 Hz using Morlet wavelets.

364 Next, building upon methods from Zhang et al.<sup>4</sup>, we identified traveling waves by identifying local  
365 plane waves across the electrodes in each oscillation cluster using a circular–linear regression model<sup>34</sup>.  
366 To measure the instantaneous phase at each electrode, we first applied a Butterworth filter to each  
367 electrode’s signal on each trial, with a filter bandwidth that extended  $\pm 15\%$  around the electrode’s  
368 mean narrowband frequency. We then measured the instantaneous phase of each electrode’s filtered  
369 signal using the Hilbert transform. At each timepoint, we converted the phase at each electrode to  
370 a relative phase shift by subtracting, at each timepoint, the mean phase of the oscillations measured  
371 across all electrodes in the oscillation cluster. We used circular statistics to manipulate all phase values  
372 with the PyCircStat toolbox<sup>93</sup>.

373 **Measuring local propagation direction.** Having computed the relative phase shift on each electrode  
374 at each timepoint, we next tested for spatial propagation of the oscillation across the cluster. Whereas  
375 our earlier work performed this task by fitting one propagation direction for the entire cluster<sup>4</sup>, instead  
376 here we separately fit the direction for each electrode individually. By allowing each electrode to have  
377 its own propagation direction, this method had improved sensitivity to TWs with curved propagation  
378 patterns, as well as to TWs that were present at only a subset of the electrodes in the cluster.

379 We fit the circular–linear model for each electrode individually, based on the phase gradient mea-  
380 sured on the nearby electrodes (within 25 mm) in the cluster. We only fit this model for electrodes  
381 with at least 3 nearby contacts. This procedure measured the features of the TW propagation around  
382 each electrode, by quantifying the propagation direction (an angle between  $\alpha \in [0^\circ, 360^\circ]$ ) and the  
383 spatial frequency ( $\xi \in [0^\circ/mm, 18^\circ/mm]$ ). To compute these parameters that describe the local TW  
384 at each electrode  $i$ , and timepoint, we fit the equation

$$\hat{\theta}_i = (ax_i + by_i + \vartheta) \pmod{360^\circ}$$

385 where  $a = \xi \cos(\alpha)$ ,  $b = \xi \sin(\alpha)$ , and  $x$  and  $y$  are the electrode’s spatial coordinates. Following  
386 earlier work<sup>4,34</sup>, we used a grid search to optimize the values for  $a$  and  $b$ . This grid search identified  
387 the propagation direction and spatial frequency for each TW by minimizing the difference between  
388 the predicted phase ( $\hat{\theta}$ ) and actual ( $\theta$ ) phase values across the nearby electrodes. We measured the  
389 statistical reliability of each model fit by computing the circular correlation coefficient between the  
390 predicted and actual phases and then adjusting for the number of fitted parameters and datapoints  
391 ( $\rho_{adj}$ )<sup>4,94</sup>.

392 Based on applying this model to each electrode individually, we then used two criteria to label an  
393 electrode cluster as exhibiting a significant TW on a given trial. First, we required that each cluster  
394 have a reliable phase gradient at the group level, as determined by averaging the adjusted correlation  
395 coefficient from all the electrodes in the cluster and ensuring it was above 0.2 (i.e.,  $\rho_{adj}^2 \geq 0.2$ ).  
396 Second, we ensured that the mean power spectrum across all electrodes exhibited a robust narrowband  
397 peak. See Fig. S9 for examples of trials without significant TWs. Based on these criteria, we included  
398 in our analyses oscillation clusters that had reliable TWs on at least 30 encoding trials.

399 **Categorization of cluster directionality.** Across oscillation clusters, we found TWs that exhibited  
400 wide-ranging propagation patterns, including unimodal, bimodal, and multimodal distributions of direc-



401 tions. To characterize these diverse patterns, we designed a method to quantify multimodal directional  
402 distributions, rather than only unimodal direction distributions.

403 To characterize these varying types of propagation patterns, we fit a mixture of von Mises distribu-  
404 tions<sup>34</sup> (the circular analogue to Gaussian distributions) to the distribution of propagation directions  
405 from all encoding trials (Supp. Fig. S3). We fit this pattern using a nonparametric model-fitting pro-  
406 cedure for circular data, which modeled the overall direction distribution as a mixture of multiple von  
407 Mises distributions, each with a different angle and magnitude. In this model, each individual fitted  
408 von Mises distribution reflects one particular direction in which the TWs on the cluster frequently  
409 propagate. Distributions fitted with more than one von Mises distribution thus showed multiple dis-  
410 tinct propagation directions. We used an iterative method to determine the best fitting mixture of von  
411 Mises curves, as the sum of the minimum number of von Mises curves (each centered at a different  
412 direction) that would fit 99% of the variance in the original distribution of propagation directions<sup>57,95</sup>.  
413 We then labeled each cluster as showing unidirectional or bidirectional propagation based on the di-  
414 rections and magnitudes of the mixture of individual fitted von Mises curves. If at least 80% of a  
415 cluster's propagation directions were fit by a single von Mises curve, then we labeled it as showing  
416 unidirectional propagation. Likewise, we labeled a cluster as bidirectional if two von Mises distributions  
417 (each representing 20–80% of TW directions) were required to capture its propagation distribution.  
418 We labeled a cluster as showing “nondirectional” TW propagation if it exhibited no consistent direc-  
419 tion over trials (Rayleigh test,  $p > 0.05$ ) or if its propagation patterns could only be accurately fit by  
420 a mixture of 3 or more von Mises distributions (this was required in 6% of all clusters).

421 **Determining a cluster's preferred propagation direction.** Next, for the clusters with bidirectional  
422 TW propagation, we tested whether one of the two predominant directions was preferred for memory  
423 encoding. To do this, we followed the earlier fitting approach, but applied it just to the trials where  
424 memory encoding was successful. We labeled the cluster's preferred direction as the angle of the  
425 von Mises distribution from the overall model fit that was closest to the most prominent propagation  
426 direction fit to the successful encoding trials. We determined the preferred angle from the model fit  
427 to all trials because this larger dataset provided more precision in categorizing propagation directions  
428 as either preferred or anti-preferred. Based on these calculations, we then used the fitted angles to  
429 label whether a TW on each individual trial propagated in a direction closer to the cluster's preferred  
430 or anti-preferred direction (Fig. 3C).

431 **Calculating the relation between TW direction and memory.** To measure the timing of the link  
432 between a cluster's propagation direction and memory encoding, we measured the prevalence of TWs  
433 moving in the “preferred” versus “anti-preferred” directions at different time offsets relative to stimulus  
434 presentation. We performed this calculation separately for trials where the word was successfully  
435 encoded as well as for trials where it was unsuccessfully encoded. We determined the cluster's preferred  
436 propagation direction based on the timepoint with the strongest difference in propagation direction  
437 between successful and unsuccessful memory encoding, and then recalculated the entire timecourse  
438 (2.6 s starting and ending 0.5 s before and after word presentation) of difference scores for each cluster  
439 based on that identified preferred direction. We used permutation tests to determine the statistical  
440 significance of the relation between TW propagation and memory encoding (see below).

441 For memory recall, we used a related method to identify the behavioral role of TW direction. At  
442 each timepoint relative to word recall, we calculated the percentage of trials with TWs propagating  
443 in the cluster's preferred direction, as determined during encoding. We calculated this for the 3 s  
444 prior to word recall or from time of previously spoken word if within 3 s of each other. Because  
445 we wanted to measure task-related changes, and individual clusters showed variability in their overall

446 level of TW propagation, we performed a baseline normalization for each cluster. For each cluster, we  
447 normalized the observed percent of TWs propagating in the preferred direction relative to the cluster's  
448 non-memory baseline. This baseline included task periods with no stimuli on screen including intertrial  
449 intervals.

450 To examine whether TWs moved in specific anatomical directions for particular memory processes  
451 (Fig. 4), across all clusters we computed a weighted distribution of the anatomical directions of TW  
452 propagation for each memory process. The weighting for each cluster's preferred or anti-preferred  
453 direction was determined from the percent of individual trials that was captured by that direction's  
454 underlying von Mises curve.

455 **Measuring the relationship between TW phase and reaction time.** To determine the relation  
456 between the phase of TWs and reaction time during the retrieval portion of our working memory  
457 task, we first calculated the instantaneous phase for each timepoint, on the electrodes in clusters  
458 with unidirectional TWs. We focused this analysis on unidirectional TWs to distinguish any observed  
459 effects from those related to directional shifts. Then, we used a circular-linear regression to test for  
460 a relation between the instantaneous phase at each timepoint relative to cue presentation and the  
461 subject's subsequent (log-transformed) reaction time. Prior to performing this analysis, we excluded  
462 trials where a subject showed poor performance. We identified these trials by normalizing each log  
463 reaction time to a z score relative to the distribution of reaction times in each session and excluding  
464 trials with z scores above 2. We labeled a cluster as showing a significant correlation between phase  
465 and reaction time if it contained at least 10 electrodes in the cluster and at least 25% of those  
466 electrodes showed a significant correlation between phase and RT at any timepoint.

467 **Statistical procedures.** We used a permutation procedure to assess whether the directional patterns  
468 that distinguished successful versus unsuccessful memory encoding were statistically reliable. We  
469 generated 100 random surrogate datasets by shuffling the labels that indicated whether each item  
470 presentation was successfully remembered or forgotten. Then, for each random surrogate datasets,  
471 we recomputed the entire statistical procedure. This provided a distribution of difference scores that  
472 indicated the magnitude of the shift between preferred and anti-preferred propagation directions for  
473 successful encoding that would be expected by chance. We tested the significance of the original  
474 directional difference scores by comparing its values with the distribution of difference scores from the  
475 surrogate data. A difference score was labeled significant if it exceeded the 95<sup>th</sup> percentile of values  
476 from the surrogate distribution (i.e.,  $p < 0.05$ ).

477 For recall, we tested the statistical significance of pre-retrieval direction shifts using two-sided  
478 binomial tests. The tests compared the prevalence of preferred and anti-preferred propagation at  
479 each timepoint before recall relative to the level in the baseline period for that cluster, correcting for  
480 multiple comparisons with the false-discovery-rate procedure<sup>96</sup>.

481 To test the reliability of memory-related direction changes across all subjects, we used a non-  
482 parametric permutation test<sup>97</sup>. This method identified contiguous time periods where TWs showed  
483 reliable increases or decreases in preferred or anti-preferred propagation, relative to the timing of  
484 particular behavioral events. This procedure assessed significance at the group level for consecutive  
485 temporal intervals by comparing the results with those found from applying the same procedure to  
486 1000 surrogate values from random shuffling, with correction for multiple comparisons.

## 487 **Acknowledgements**

488 We thank Anup Das, Tom Donoghue, Bard Ermentrout, Molly Hermiller, Lukas Kunz, Serra Favila,  
489 Jacqueline Gottlieb, Bradley Lega, Salman Qasim, & Erfan Zabehe for providing helpful critical feedback  
490 on the manuscript. We thank Michael Kahana, Paul Wanda, & Joseph Rudoler for providing data and  
491 technical support.

## 492 **Funding**

493 This work was supported by the DARPA Restoring Active Memory (RAM) program (Cooperative  
494 Agreement N66001-14-2-4032) and National Institutes of Health Grants R01-MH104606, U01-  
495 NS113198, and RF1-MH114276. The views, opinions and/or findings expressed are those of the  
496 author and should not be interpreted as representing the official views or policies of the Department  
497 of Defense or the U.S. Government.

## 498 **Author contributions**

499 U.M., H.Z., and J.J. designed and implemented the data analyses, and U.M. and J.J. wrote the  
500 manuscript.

## 501 References

- 502 [1] George B Ermentrout and David Kleinfeld. Traveling Electrical Waves in Cortex Insights from  
503 Phase Dynamics and Speculation on a Computational Role. *Neuron*, 29(1):33–44, 2001.
- 504 [2] Lyle Muller, Frédéric Chavane, John Reynolds, and Terrence J Sejnowski. Cortical travelling  
505 waves: mechanisms and computational principles. *Nature Reviews Neuroscience*, 2018.
- 506 [3] Evgueniy V Lubenov and Athanassios G Siapas. Hippocampal theta oscillations are travelling  
507 waves. *Nature*, 459(7246):534–539, 2009.
- 508 [4] Honghui Zhang, Andrew J Watrous, Ansh Patel, and Joshua Jacobs. Theta and alpha oscillations  
509 are traveling waves in the human neocortex. *Neuron*, 98(6):1269 – 1281.e4, 2018.
- 510 [5] Zachary W Davis, Lyle Muller, Julio Martinez-Trujillo, Terrence Sejnowski, and John H Reynolds.  
511 Spontaneous travelling cortical waves gate perception in behaving primates. *Nature*, 587(7834):  
512 432–436, 2020.
- 513 [6] Andrea Benucci, Robert A Frazor, and Matteo Carandini. Standing waves and traveling waves  
514 distinguish two circuits in visual cortex. *Neuron*, 55(1):103–117, 2007.
- 515 [7] Arif A Hamid, Michael J Frank, and Christopher I Moore. Wave-like dopamine dynamics as a  
516 mechanism for spatiotemporal credit assignment. *Cell*, 184(10):2733–2749, 2021.
- 517 [8] J Jesús Hernández-Pérez, Keiland W Cooper, and Ehren L Newman. Medial entorhinal cortex  
518 activates in a traveling wave in the rat. *Elife*, 9:e52289, 2020.
- 519 [9] Ali Bahramisharif, Marcel AJ van Gerven, Erik J Aarnoutse, Manuel R Mercier, Theodore H  
520 Schwartz, John J Foxe, Nick F Ramsey, and Ole Jensen. Propagating neocortical gamma bursts  
521 are coordinated by traveling alpha waves. *The Journal of Neuroscience*, 33(48):18849–18854,  
522 2013.
- 523 [10] David M Alexander, Peter Jurica, Chris Trengove, Andrey R Nikolaev, Sergei Gepshtein, Mikhail  
524 Zvyagintsev, Klaus Mathiak, Andreas Schulze-Bonhage, Johanna Ruescher, Tonio Ball, et al.  
525 Traveling waves and trial averaging: The nature of single-trial and averaged brain responses in  
526 large-scale cortical signals. *Neuroimage*, 73:95–112, 2013.
- 527 [11] Tatsuo K Sato, Ian Nauhaus, and Matteo Carandini. Traveling waves in visual cortex. *Neuron*,  
528 75(2):218–229, 2012.
- 529 [12] E. D. Adrian and B. H. C. Matthews. The berger rhythm: Potential changes from the occipital  
530 lobes in man. *Brain*, 57(4):355–85, 1934.
- 531 [13] I. Nauhaus, L. Busse, M. Carandini, and D. L. Ringach. Stimulus contrast modulates functional  
532 connectivity in visual cortex. *Nature Neuroscience*, 12(1):70–76, 2009.
- 533 [14] Lyle Muller, Alexandre Reynaud, Frédéric Chavane, and Alain Destexhe. The stimulus-evoked  
534 population response in visual cortex of awake monkey is a propagating wave. *Nature communi-*  
535 *cations*, 5(1):1–14, 2014.
- 536 [15] Lyle Muller, Giovanni Piantoni, Dominik Koller, Sydney S Cash, Eric Halgren, and Terrence J  
537 Sejnowski. Rotating waves during human sleep spindles organize global patterns of activity that  
538 repeat precisely through the night. *eLife*, 5:e17267, 2016.

- 539 [16] Marcello Massimini, Reto Huber, Fabio Ferrarelli, Sean Hill, and Giulio Tononi. The sleep slow  
540 oscillation as a traveling wave. *The Journal of Neuroscience*, 24(31):6862–6870, 2004.
- 541 [17] Kazutaka Takahashi, Sanggyun Kim, Todd P Coleman, Kevin A Brown, Aaron J Suminski,  
542 Matthew D Best, and Nicholas G Hatsopoulos. Large-scale spatiotemporal spike patterning  
543 consistent with wave propagation in motor cortex. *Nature communications*, 6(1):1–11, 2015.
- 544 [18] David M Alexander, Peter Jurica, Chris Tregrove, Andrey R Nikolaev, Sergei Gepshtein, Mikhail  
545 Zvyagintsev, Klaus Mathiak, Andreas Schulze-Bonhage, Johanna Ruescher, Tonio Ball, et al.  
546 Traveling waves and trial averaging: the nature of single-trial and averaged brain responses in  
547 large-scale cortical signals. *Neuroimage*, 73:95–112, 2013.
- 548 [19] James A Roberts, Leonardo L Gollo, Romesh G Abeyesuriya, Gloria Roberts, Philip B Mitchell,  
549 Mark W Woolrich, and Michael Breakspear. Metastable brain waves. *Nature communications*,  
550 10(1):1–17, 2019.
- 551 [20] Sayak Bhattacharya, Matthieu BL Cauchois, Pablo A Iglesias, and Zhe Sage Chen. The impact  
552 of a closed-loop thalamocortical model on the spatiotemporal dynamics of cortical and thalamic  
553 traveling waves. *Scientific reports*, 11(1):1–19, 2021.
- 554 [21] Nancy J Kopell, Howard J Gritton, Miles A Whittington, and Mark A Kramer. Beyond the  
555 connectome: the dynome. *Neuron*, 83(6):1319–1328, 2014.
- 556 [22] Michael Breakspear. Dynamic models of large-scale brain activity. *Nature neuroscience*, 20(3):  
557 340–352, 2017.
- 558 [23] E. Salinas and T.J. Sejnowski. Correlated neuronal activity and the flow of neural information.  
559 *Nature Reviews Neuroscience*, 2(8):539 – 550, 2001. doi: 10.1038/35086012.
- 560 [24] Andrea Alamia and Rufin VanRullen. Alpha oscillations and traveling waves: Signatures of pre-  
561 dictive coding? *PLoS Biology*, 17(10):e3000487, 2019.
- 562 [25] Zhaoyang Pang, Andrea Alamia, and Rufin VanRullen. Turning the stimulus on and off changes  
563 the direction of  $\alpha$  traveling waves. *Eneuro*, 7(6), 2020.
- 564 [26] N. A. Busch, J. Dubois, and R. VanRullen. The phase of ongoing EEG oscillations predicts visual  
565 perception. *The Journal of Neuroscience*, 29:7869–7876, 2009.
- 566 [27] Kyle E Mathewson, Gabriele Gratton, Monica Fabiani, Diane M Beck, and Tony Ro. To see  
567 or not to see: prestimulus  $\alpha$  phase predicts visual awareness. *Journal of Neuroscience*, 29(9):  
568 2725–2732, 2009.
- 569 [28] Randolph F Helfrich, Ian C Fiebelkorn, Sara M Szczepanski, Jack J Lin, Josef Parvizi, Robert T  
570 Knight, and Sabine Kastner. Neural mechanisms of sustained attention are rhythmic. *Neuron*,  
571 99(4):854–865, 2018.
- 572 [29] Laura Dugué, Philippe Marque, and Rufin VanRullen. The phase of ongoing oscillations mediates  
573 the causal relation between brain excitation and visual perception. *Journal of neuroscience*, 31  
574 (33):11889–11893, 2011.
- 575 [30] Ian C Fiebelkorn, Mark A Pinsk, and Sabine Kastner. A dynamic interplay within the frontoparietal  
576 network underlies rhythmic spatial attention. *Neuron*, 99(4):842–853, 2018.

- 577 [31] P. B. Sederberg, M. J. Kahana, M. W. Howard, E. J. Donner, and J. R. Madsen. Theta and  
578 gamma oscillations during encoding predict subsequent recall. *Journal of Neuroscience*, 23(34):  
579 10809–10814, 2003.
- 580 [32] S. Sternberg. High-speed scanning in human memory. *Science*, 153:652–654, 1966.
- 581 [33] J. F. Burke, K. A. Zaghoul, J. Jacobs, R. B. Williams, M. R. Sperling, A. D. Sharan, and  
582 M. J. Kahana. Synchronous and asynchronous theta and gamma activity during episodic memory  
583 formation. *Journal of Neuroscience*, 33(1):292–304, 2013.
- 584 [34] N. I. Fisher. *Statistical Analysis of Circular Data*. Cambridge University Press, Cambridge,  
585 England, 1993.
- 586 [35] Honghui Zhang and Joshua Jacobs. Traveling theta waves in the human hippocampus. *The*  
587 *Journal of Neuroscience*, 35(36):12477–12487, 2015.
- 588 [36] J. F. Burke, N. M. Long, K. A. Zaghoul, A. D. Sharan, M. R. Sperling, and M. J. Kahana.  
589 Human intracranial high-frequency activity maps episodic memory formation in space and time.  
590 *NeuroImage*, 85:834–843, 2014.
- 591 [37] S. M. Polyn, K. A. Norman, and M. J. Kahana. A context maintenance and retrieval model  
592 of organizational processes in free recall. *Psychological Review*, 116(1):129–156, 2009. doi:  
593 10.1037/a0014420.
- 594 [38] J. Lisman and M. A. Idiart. Storage of  $7 \pm 2$  short-term memories in oscillatory subcycles. *Science*,  
595 267:1512–1515, 1995.
- 596 [39] Ali Bahramisharif, Ole Jensen, Joshua Jacobs, and John Lisman. Serial representation of items  
597 during working memory maintenance at letter-selective cortical sites. *PLoS biology*, 16(8):  
598 e2003805, 2018.
- 599 [40] R. T. Canolty, E. Edwards, S. S. Dalal, M. Soltani, S. S. Nagarajan, H. E. Kirsch, M. S. Berger,  
600 N. M. Barbaro, and R. T. Knight. High gamma power is phase-locked to theta oscillations in  
601 human neocortex. *Science*, 313(5793):1626–1628, 2006.
- 602 [41] J. Jacobs, M. J. Kahana, A. D. Ekstrom, and I. Fried. Brain oscillations control timing of  
603 single-neuron activity in humans. *Journal of Neuroscience*, 27(14):3839–3844, 2007.
- 604 [42] Artur Luczak, Bruce L McNaughton, and Kenneth D Harris. Packet-based communication in the  
605 cortex. *Nature Reviews Neuroscience*, 16(12):745–755, 2015.
- 606 [43] Stewart Heitmann, Tjeerd Boonstra, and Michael Breakspear. A dendritic mechanism for decod-  
607 ing traveling waves: principles and applications to motor cortex. *PLoS computational biology*, 9  
608 (10):e1003260, 2013.
- 609 [44] Jonathan K Kleen, Jason E Chung, Kristin K Sellers, Jenny Zhou, Michael Triplett, Kye Lee,  
610 Angela Tooker, Razi Haque, and Edward F Chang. Bidirectional propagation of low frequency  
611 oscillations over the human hippocampal surface. *Nature Communications*, 12(1):1–10, 2021.
- 612 [45] Stewart Heitmann, Pulin Gong, and Michael Breakspear. A computational role for bistability and  
613 traveling waves in motor cortex. *Frontiers in computational neuroscience*, 6:67, 2012.

- 614 [46] Ryan Place, Anja Farovik, Marco Brockmann, and Howard Eichenbaum. Bidirectional prefrontal-  
615 hippocampal interactions support context-guided memory. *Nature neuroscience*, 19(8):992, 2016.
- 616 [47] Hyoe Tomita, Machiko Ohbayashi, Kiyoshi Nakahara, Isao Hasegawa, and Yasushi Miyashita.  
617 Top-down signal from prefrontal cortex in executive control of memory retrieval. *Nature*, 401  
618 (6754):699–703, 1999.
- 619 [48] Priyamvada Rajasethupathy, Sethuraman Sankaran, James H Marshel, Christina K Kim, Emily  
620 Ferenczi, Soo Yeun Lee, Andre Berndt, Charu Ramakrishnan, Anna Jaffe, Maisie Lo, et al.  
621 Projections from neocortex mediate top-down control of memory retrieval. *Nature*, 526(7575):  
622 653–659, 2015.
- 623 [49] Daniel J Felleman and David C Van Essen. Distributed hierarchical processing in the primate  
624 cerebral cortex. *Cerebral cortex*, 1(1):1–47, 1991.
- 625 [50] Nikola T Markov, Julien Vezoli, Pascal Chameau, Arnaud Falchier, René Quilodran, Cyril Huis-  
626 soud, Camille Lamy, Pierre Misery, Pascale Giroud, Shimon Ullman, et al. Anatomy of hierarchy:  
627 feedforward and feedback pathways in macaque visual cortex. *Journal of Comparative Neurology*,  
628 522(1):225–259, 2014.
- 629 [51] Andre Moraes Bastos, Julien Vezoli, Conrado Arturo Bosman, Jan-Mathijs Schoffelen, Robert  
630 Oostenveld, Jarrod Robert Dowdall, Peter De Weerd, Henry Kennedy, and Pascal Fries. Visual  
631 areas exert feedforward and feedback influences through distinct frequency channels. *Neuron*, 85  
632 (2):390–401, 2015.
- 633 [52] Pascal Fries. Rhythms for cognition: communication through coherence. *Neuron*, 88(1):220–  
634 235, 2015.
- 635 [53] Elizabeth A Buffalo, Pascal Fries, Rogier Landman, Hualou Liang, and Robert Desimone. A  
636 backward progression of attentional effects in the ventral stream. *Proceedings of the National  
637 Academy of Sciences*, 107(1):361–365, 2010.
- 638 [54] Karl Friston. Hierarchical models in the brain. *PLoS computational biology*, 4(11):e1000211,  
639 2008.
- 640 [55] A. Engel, P. Fries, and W. Singer. Dynamic predictions: oscillations and synchrony in top-down  
641 processing. *Nature Reviews Neuroscience*, 2(10):704–716, 2001.
- 642 [56] Doug Rubino, Kay A Robbins, and Nicholas G Hatsopoulos. Propagating waves mediate infor-  
643 mation transfer in the motor cortex. *Nature Neuroscience*, 9(12):1549–1557, 2006.
- 644 [57] Karthikeyan Balasubramanian, Vasileios Papadourakis, Wei Liang, Kazutaka Takahashi,  
645 Matthew D Best, Aaron J Suminski, and Nicholas G Hatsopoulos. Propagating motor corti-  
646 cal dynamics facilitate movement initiation. *Neuron*, 106(3):526–536, 2020.
- 647 [58] Sayak Bhattacharya, Scott L Brincat, Mikael Lundqvist, and Earl K Miller. Traveling waves in  
648 the prefrontal cortex during working memory. *PLoS Comput Biol*, 18(1), 2022.
- 649 [59] Jin Li, Dan Cao, Vasileios Dimakopoulos, Weiyang Shi, Shan Yu, Lingzhong Fan, Lennart  
650 Stieglitz, Lukas Imbach, Johannes Sarnthein, and Tianzi Jiang. Anterior-posterior hippocam-  
651 pal dynamics support working memory processing. *Journal of Neuroscience*, 2021.

- 652 [60] Georgios Michalareas, Julien Vezoli, Stan Van Pelt, Jan-Mathijs Schoffelen, Henry Kennedy, and  
653 Pascal Fries. Alpha-beta and gamma rhythms subserve feedback and feedforward influences  
654 among human visual cortical areas. *Neuron*, 89(2):384–397, 2016.
- 655 [61] Diego Contreras, Alain Destexhe, Terrence J Sejnowski, and Mircea Steriade. Spatiotemporal  
656 patterns of spindle oscillations in cortex and thalamus. *Journal of Neuroscience*, 17(3):1179–  
657 1196, 1997.
- 658 [62] Lyle Muller and Alain Destexhe. Propagating waves in thalamus, cortex and the thalamocortical  
659 system: experiments and models. *Journal of Physiology-Paris*, 106(5-6):222–238, 2012.
- 660 [63] Milan Halgren, István Ulbert, H  lene Bastuji, D  niel Fab  , Lorand Er  ss, Marc Rey, Orrin Devin-  
661 sky, Werner K Doyle, Rachel Mak-McCully, Eric Halgren, et al. The generation and propagation  
662 of the human alpha rhythm. *Proceedings of the National Academy of Sciences*, 116(47):23772–  
663 23782, 2019.
- 664 [64] Michael Breakspear, Stewart Heitmann, and Andreas Daffertshofer. Generative models of corti-  
665 cal oscillations: neurobiological implications of the kuramoto model. *Frontiers in human neuro-  
666 science*, 4:190, 2010.
- 667 [65] P. Fries, J. H. Reynolds, A. E. Rorie, and R. Desimone. Modulation of oscillatory neuronal  
668 synchronization by selective visual attention. *Science*, 291(5508):1560–1563, 2001.
- 669 [66] Elham Barzegaran and Gijs Plomp. Multiple concurrent feedforward and feedback streams in a  
670 cortical hierarchy. *bioRxiv*, 2021.
- 671 [67] Jean-R  mi King and Valentin Wyart. The human brain encodes a chronicle of visual events at  
672 each instant of time through the multiplexing of traveling waves. *Journal of Neuroscience*, 41  
673 (34):7224–7233, 2021.
- 674 [68] Simon Hanslmayr, Gregor Volberg, Maria Wimber, Sarang S Dalal, and Mark W Greenlee. Pres-  
675 timulus oscillatory phase at 7 hz gates cortical information flow and visual perception. *Current  
676 Biology*, 23(22):2273–2278, 2013.
- 677 [69] P. Sauseng, W. Klimesch, M. Doppelmayr, T. Pecherstorfer, R. Freunberger, and S. Hanslmayr.  
678 Eeg alpha synchronization and functional coupling during top-down processing in a working mem-  
679 ory task. *Human Brain Mapping*, 26(2):148–155, 2005.
- 680 [70] S. Hanslmayr, G. Volberg, M. Wimber, M. Raabe, M. W. Greenlee, and K. H. T. B  umel. The  
681 relationship between brain oscillations and bold signal during memory formation: A combined  
682 eeg-fmri study. *Journal of Neuroscience*, 31(44):15674–15680, 2011.
- 683 [71] Timothy M Patten, Christopher J Rennie, Peter A Robinson, and Pulin Gong. Human cortical  
684 traveling waves: dynamical properties and correlations with responses. *PloS ONE*, 7(6):e38392,  
685 2012.
- 686 [72] Diego Lozano-Soldevilla and Rufin VanRullen. The hidden spatial dimension of alpha: 10-hz  
687 perceptual echoes propagate as periodic traveling waves in the human brain. *Cell reports*, 26(2):  
688 374–380, 2019.
- 689 [73] Arjen Stolk, Loek Brinkman, Mariska J Vansteensel, Erik Aarnoutse, Frans SS Leijten, Chris H  
690 Dijkerman, Robert T Knight, Floris P de Lange, and Ivan Toni. Electrographic dissociation  
691 of alpha and beta rhythmic activity in the human sensorimotor system. *Elife*, 8:e48065, 2019.



- 692 [74] R. T. Canolty and R. T. Knight. The functional role of cross-frequency coupling. *Trends in*  
693 *Cognitive Science*, 14(11):506–515, 2010.
- 694 [75] J. Lisman. The theta/gamma discrete phase code occurring during the hippocampal phase  
695 precession may be a more general brain coding scheme. *Hippocampus*, 15:913–922, 2005.
- 696 [76] W.J. Freeman. A cinematographic hypothesis of cortical dynamics in perception. *International*  
697 *Journal of Psychophysiology*, 60(2):149–161, 2006.
- 698 [77] Walter Pitts and Warren S McCulloch. How we know universals the perception of auditory and  
699 visual forms. *The Bulletin of mathematical biophysics*, 9(3):127–147, 1947.
- 700 [78] Behzad Zareian, Kouros Maboudi, Mohammad Reza Daliri, Hamid Abrishami Moghaddam, Ste-  
701 fan Treue, and Moein Esghaei. Attention strengthens across-trial pre-stimulus phase coherence  
702 in visual cortex, enhancing stimulus processing. *Scientific reports*, 10(1):1–12, 2020.
- 703 [79] Rufin VanRullen, Niko Busch, Jan Drewes, and Julien Dubois. Ongoing eeg phase as a trial-by-  
704 trial predictor of perceptual and attentional variability. *Frontiers in psychology*, 2:60, 2011.
- 705 [80] Sabine Kastner, Mark A Pinsk, Peter De Weerd, Robert Desimone, and Leslie G Ungerleider.  
706 Increased activity in human visual cortex during directed attention in the absence of visual stim-  
707 ulation. *Neuron*, 22(4):751–761, 1999.
- 708 [81] T. J. Buschman and E. K. Miller. Top-down versus bottom-up control of attention in the  
709 prefrontal and posterior parietal cortices. *Science*, 315(5820):1860–1862, 2007.
- 710 [82] Adam Gazzaley and Anna C Nobre. Top-down modulation: bridging selective attention and  
711 working memory. *Trends in cognitive sciences*, 16(2):129–135, 2012.
- 712 [83] Saskia Haegens, Helena Cousijn, George Wallis, Paul J Harrison, and Anna C Nobre. Inter-and  
713 intra-individual variability in alpha peak frequency. *Neuroimage*, 92:46–55, 2014.
- 714 [84] Keyvan Mahjoory, Jan-Mathijs Schoffelen, Anne Keitel, and Joachim Gross. The frequency  
715 gradient of human resting-state brain oscillations follows cortical hierarchies. *Elife*, 9:e53715,  
716 2020.
- 717 [85] Sophia Mueller, Danhong Wang, Michael D Fox, BT Thomas Yeo, Jorge Sepulcre, Mert R  
718 Sabuncu, Rebecca Shafee, Jie Lu, and Hesheng Liu. Individual variability in functional connectivity  
719 architecture of the human brain. *Neuron*, 77(3):586–595, 2013.
- 720 [86] Nicholas A Steinmetz, Christof Koch, Kenneth D Harris, and Matteo Carandini. Challenges  
721 and opportunities for large-scale electrophysiology with neuropixels probes. *Current opinion in*  
722 *neurobiology*, 50:92–100, 2018.
- 723 [87] Dion Khodagholy, Jennifer N Gelinias, Thomas Thesen, Werner Doyle, Orrin Devinsky, George G  
724 Malliaras, and György Buzsáki. Neurogrid: recording action potentials from the surface of the  
725 brain. *Nature neuroscience*, 18(2):310–315, 2015.
- 726 [88] U Ribary, AA Ioannides, Krish Devi Singh, R Hasson, JP Bolton, F Lado, A Mogilner, and  
727 R Llinas. Magnetic field tomography of coherent thalamocortical 40-hz oscillations in humans.  
728 *Proceedings of the National Academy of Sciences*, 88(24):11037–11041, 1991.

- 729 [89] Elena Boto, Sofie S Meyer, Vishal Shah, Orang Alem, Svenja Knappe, Peter Kruger, T Mark  
730 Fromhold, Mark Lim, Paul M Glover, Peter G Morris, et al. A new generation of magne-  
731 toencephalography: Room temperature measurements using optically-pumped magnetometers.  
732 *NeuroImage*, 149:404–414, 2017.
- 733 [90] Christopher P Said, Ryan D Egan, Nancy J Minshew, Marlene Behrmann, and David J Heeger.  
734 Normal binocular rivalry in autism: implications for the excitation/inhibition imbalance hypothesis.  
735 *Vision Research*, 77:59–66, 2013.
- 736 [91] Elliot H Smith, Jyun-you Liou, Edward M Merricks, Tyler Davis, Kyle Thomson, Bradley Greger,  
737 Paul House, Ronald G Emerson, Robert Goodman, Guy M McKhann, et al. Human interic-  
738 tal epileptiform discharges are bidirectional traveling waves echoing ictal discharges. *eLife*, 11:  
739 e73541, 2022.
- 740 [92] J. Talairach and P. Tournoux. *Co-planar stereotaxic atlas of the human brain*. Verlag, Stuttgart,  
741 1988.
- 742 [93] P. Berens. Circstat: A matlab toolbox for circular statistics. *Journal of Statistical Software*, 31  
743 (10), 2009.
- 744 [94] Richard Kempter, Christian Leibold, György Buzsáki, Kamran Diba, and Robert Schmidt. Quanti-  
745 fying circular–linear associations: Hippocampal phase precession. *Journal of Neuroscience Meth-*  
746 *ods*, 207(1):113–124, 2012.
- 747 [95] Nurulkamal Masseran, Ahmad Mahir Razali, Kamarulzaman Ibrahim, and Mohd Talib Latif. Fit-  
748 ting a mixture of von mises distributions in order to model data on wind direction in peninsular  
749 malaysia. *Energy Conversion and Management*, 72:94–102, 2013.
- 750 [96] Y. Benjamini and Y. Hochberg. Controlling the False Discovery Rate: a practical and powerful  
751 approach to multiple testing. *Journal of Royal Statistical Society, Series B*, 57:289–300, 1995.
- 752 [97] Robert Oostenveld, Pascal Fries, Eric Maris, and Jan-Mathijs Schoffelen. Fieldtrip: open source  
753 software for advanced analysis of meg, eeg, and invasive electrophysiological data. *Computational*  
754 *intelligence and neuroscience*, 2011, 2011.

**Supplemental Information:**  
**The propagation direction of human theta and alpha traveling waves predicts memory performance**

Uma R. Mohan, Honghui Zhang, Joshua Jacobs

**Video S1: Example traveling wave (TW) on a trial where memory encoding was successful.** *Animation of a TW in patient 34 during successful encoding (Related to Figure 2). Animation includes filtered signals during trial, local directions indicated on brain map, single arrow of mean direction across electrodes, and topography of TWs phase over time. Single arrow indicating mean direction across electrodes is visible when wave is reliable.*

**Video S2: Example traveling wave (TW) on a trial where memory encoding was unsuccessful.** *Data from patient 34. Same format as Supp. Video S1.*

**Video S3: Animation of a traveling wave that showed a correlation between phase and reaction time during memory retrieval.**

| Region                     | Patients | Surface Electrodes | Electrodes in oscillation clusters | Oscillatory Range | # clusters | # clusters with TWs | # nondirectional clusters | # unidirectional clusters | # bidirectional clusters | # memory related bidirectional clusters |
|----------------------------|----------|--------------------|------------------------------------|-------------------|------------|---------------------|---------------------------|---------------------------|--------------------------|-----------------------------------------|
| <b>ENCODING</b>            |          |                    |                                    |                   |            |                     |                           |                           |                          |                                         |
| <b>Frontal</b>             | 57       | 1658               | 1391                               |                   |            |                     |                           |                           |                          |                                         |
|                            |          |                    |                                    | <b>Theta</b>      | 41         | 32                  | 3                         | 10                        | 19                       | 14                                      |
|                            |          |                    |                                    | <b>Alpha</b>      | 12         | 11                  | 0                         | 4                         | 7                        | 6                                       |
|                            |          |                    |                                    | <b>Beta</b>       | 43         | 30                  | 0                         | 13                        | 17                       | 10                                      |
| <b>Temporal</b>            | 55       | 1351               | 1080                               |                   |            |                     |                           |                           |                          |                                         |
|                            |          |                    |                                    | <b>Theta</b>      | 22         | 19                  | 1                         | 10                        | 8                        | 8                                       |
|                            |          |                    |                                    | <b>Alpha</b>      | 14         | 13                  | 1                         | 9                         | 3                        | 2                                       |
|                            |          |                    |                                    | <b>Beta</b>       | 28         | 21                  | 3                         | 12                        | 6                        | 3                                       |
| <b>Parietal/ Occipital</b> | 57       | 1009               | 935                                |                   |            |                     |                           |                           |                          |                                         |
|                            |          |                    |                                    | <b>Theta</b>      | 25         | 21                  | 1                         | 7                         | 13                       | 9                                       |
|                            |          |                    |                                    | <b>Alpha</b>      | 10         | 6                   | 1                         | 3                         | 2                        | 1                                       |
|                            |          |                    |                                    | <b>Beta</b>       | 26         | 19                  | 2                         | 8                         | 9                        | 5                                       |
| <b>RECALL</b>              |          |                    |                                    |                   |            |                     |                           |                           |                          |                                         |
| <b>Frontal</b>             | 58       | 1884               | 1699                               |                   |            |                     |                           |                           |                          |                                         |
|                            |          |                    |                                    | <b>Theta</b>      | 53         | 44                  | 7                         | 12                        | 25                       | 15                                      |
|                            |          |                    |                                    | <b>Alpha</b>      | 17         | 15                  | 1                         | 2                         | 10                       | 5                                       |
|                            |          |                    |                                    | <b>Beta</b>       | 53         | 48                  | 7                         | 18                        | 24                       | 9                                       |
| <b>Temporal</b>            | 55       | 1277               | 965                                |                   |            |                     |                           |                           |                          |                                         |
|                            |          |                    |                                    | <b>Theta</b>      | 19         | 19                  | 1                         | 9                         | 9                        | 5                                       |
|                            |          |                    |                                    | <b>Alpha</b>      | 14         | 13                  | 0                         | 7                         | 6                        | 3                                       |
|                            |          |                    |                                    | <b>Beta</b>       | 23         | 22                  | 4                         | 8                         | 10                       | 5                                       |
| <b>Parietal/ Occipital</b> | 59       | 1059               | 992                                |                   |            |                     |                           |                           |                          |                                         |
|                            |          |                    |                                    | <b>Theta</b>      | 22         | 21                  | 2                         | 6                         | 13                       | 7                                       |
|                            |          |                    |                                    | <b>Alpha</b>      | 17         | 15                  | 3                         | 4                         | 8                        | 3                                       |
|                            |          |                    |                                    | <b>Beta</b>       | 25         | 20                  | 5                         | 5                         | 10                       | 4                                       |

**Table S1: Prevalence of traveling waves by brain region.** *The numbers in the left column of this table indicate the total number of subjects with surface grid and strip electrodes in each region. For each combination of region and frequency range, we measured the number of clusters with TWs and then categorized them by their directional patterns. Rows denote combinations of brain region and oscillatory frequency range, separately during memory encoding and recall. Columns denote the category of each TW clusters.*

| Subject ID | Sex | Age | Handedness | Surface electrode coverage                                        | Traveling waves                                                                    | Mean recall rate |
|------------|-----|-----|------------|-------------------------------------------------------------------|------------------------------------------------------------------------------------|------------------|
| 1          | F   | 48  | Left       | LF (10), LO (5), LP (8), LT (9), RF (9), RO (2), RP (12), RT (11) | RP (7.5), LP (8.0), LP (13.8)                                                      | 19.2             |
| 2          | F   | 49  | Left       | LF (18), LT (3), LT (9), RF (16), RT (12)                         | LF (19.5), LF (21.3), LF (8.0), RF (19.6)                                          | 39               |
| 3          | F   | 39  | Left       | LF (50), LO (1), LP (14), LT (27)                                 | LF (18.7), LT (7.8), LF (5.1), LT (12.3), LF (5.7), LF (4.0)                       | 33.2             |
| 20         | F   | 49  | Left       | RF (32), RT (2), RO (12), RP (8), RT (29)                         | RT (14.7), RO (13.6), RT (9.1)                                                     | 38               |
| 26         | F   | 25  | Unknown    | LO (18), LP (29), LT (4)                                          | LP (5.4), LO (18.8), LP (10.6)                                                     | 22.7             |
| 32         | F   | 20  | Left       | LF (6), LP (2), LT (8), RF (4), RP (6), RT (6)                    | LT (8.1), RP (17.2), RF (7.7), LF (19.2)                                           | 31.7             |
| 33         | F   | 32  | Left       | LF (6), LP (3), LT (7), RF (8), RO (2), RP (2), RT (12)           | RF (22.5), LF (23.0), RT (20.1)                                                    | 21.3             |
| 34         | F   | 29  | Left       | LF (61), LP (4), LT (10), RF (17), RP (9)                         | LT (8.9), LP (9.3), LF (5.6), LF (17.0), RF (10.1), LF (6.2), LF (12.3), LP (24.5) | 9.1              |
| 36         | M   | 49  | Right      | LF (20), LT (2), LO (1), LP (22), LT (35)                         | LT (6.0)                                                                           | 16.3             |
| 39         | F   | 28  | Unknown    | RF (63), RP (26), RT (11)                                         | RF (4.7), RF (28.8), RP (7.3)                                                      | 22.2             |
| 42         | F   | 28  | Unknown    | RF (18), RP (32), RT (22)                                         | RP (8.6), RP (18.5), RP (5.2), RP (3.8)                                            | 63               |
| 45         | M   | 51  | Left       | LF (21), LP (3), LT (11), RF (5), RP (1), RT (6)                  | LF (7.8), LF (23.1), LF (7.7), LT (17.8), RF (7.7)                                 | 32.7             |
| 50         | M   | 20  | Unknown    | LF (3), LO (3), LP (35), LT (23)                                  | LP (7.0), LP (16.2)                                                                | 42               |
| 51         | F   | 25  | Left       | LF (15), LP (9), RF (8), RP (14), ROther(2)                       | LF (19.3), RP (14.2), LF (5.4), RP (3.4)                                           | 39.6             |
| 53         | F   | 39  | Unknown    | RF (27), RT (1), RP (9), RT (27)                                  | RF (15.5), RF (6.4)                                                                | 17.8             |
| 60         | F   | 37  | Unknown    | RF (30), RP (6), RT (28)                                          | RT (8.2)                                                                           | 30.4             |
| 66         | M   | 39  | Left       | LT (2), LO (1), LP (8), LT (11), RF (5), RT (12), RO (1)          | RF (7.9)                                                                           | 33.2             |
| 68         | F   | 39  | Left       | RT (3), RO (11), RP (17), RT (31)                                 | RT (17.5), RO (15.0), RP (10.5)                                                    | 52               |
| 69         | M   | 27  | Left       | LF (43), LP (37), LT (8)                                          | RF (15.8), RF (4.6), RP (7.4), RP (10.0), RP (5.7)                                 | 28.7             |
| 76         | M   | 30  | Unknown    | LF (32), RF (2), RP (9)                                           | LF (5.8), LF (19.4), RP (5.7), LF (11.5), RP (16.3)                                | 25.7             |
| 84         | M   | 25  | Left       | LF (38), LP (41), LT (4), RF (3)                                  | LF (5.4), LF (21.0), LF (8.5), LP (7.2)                                            | 17.7             |
| 86         | M   | 21  | Left       | LF (29), LT (2), LO (1), LP (2), LT (39), RF (3)                  | LF (5.9), LF (20.1)                                                                | 30               |
| 89         | M   | 36  | Left       | LF (2), LT (2), LT (6), RF (26), RT (3), RP (26), RT (37)         | RT (7.7), RT (18.9)                                                                | 16               |
| 102        | M   | 35  | Left       | LF (12), LP (6), LT (12), RF (10), RT (11)                        | LF (20.1), LF (5.9), RF (19.9), RT (3.5), RF (5.8), LP (7.1)                       | 25.3             |
| 104        | M   | 22  | Left       | RF (49), RP (21), RT (22)                                         | RF (6.4), RF (26.5), RP (19.3)                                                     | 31.3             |
| 112        | F   | 30  | Unknown    | LF (3), RF (17), RO (1), RP (1), T (24)                           | RT (6.9), RT (15.4)                                                                | 12.7             |
| 128        | M   | 26  | Unknown    | RF (10), RP (8), RT (6)                                           | RF (6.7)                                                                           | 47               |
| 129        | F   | 35  | Unknown    | LF (28), LOther (10), LP (6), LT (3), RF (27), RP (4), Rother (2) | RF (13.5), RF (4.4), LP (13.1), LF (4.9), LF (14.6), LP (4.8)                      | 17.5             |
| 130        | M   | 57  | Left       | LF (40), LP (32), RF (8)                                          | LF (5.5), LF (11.0), LF (19.0), RF (5.2), LP (4.2)                                 | 19.6             |
| 135        | M   | 48  | Left       | RF (15), RO (5), RP (8), RT (7)                                   | RF (23.3), RF (4.5), RF (12.8)                                                     | 8.9              |
| 136        | F   | 57  | Unknown    | LF (23), LT (4), LO (1), LP (7), LT (34), RF (1), RT (18)         | LT (8.3), LT (18.7), RT (7.6), RT (16.2)                                           | 19.8             |
| 142        | F   | 44  | Unknown    | LF (13), RF (47), RP (4), RT (17)                                 | LF (11.0), RF (5.5), RF (11.4), LF (5.4), RT (14.9), RF (10.3)                     | 16               |
| 147        | M   | 48  | Left       | LF (32), LO (6), LP (28), LT (41), RF (1)                         | LT (20.0), LT (6.3), LT (10.1), LP (13.6)                                          | 18.1             |
| 149        | F   | 28  | Left       | LF (17), LT (11), LP (5), LT (39)                                 | LT (8.6), LT (19.5), LT (4.5), LF (23.1)                                           | 21.3             |
| 151        | M   | 36  | Left       | LF (9), LP (4), LT (7)                                            | LP (7.6), LP (18.2)                                                                | 27.5             |
| 154        | F   | 36  | Left       | LF (20), LP (4), LT (40)                                          | LT (11.4), LF (22.9), LT (17.8), LT (4.5), LP (21.8)                               | 30.1             |
| 155        | M   | 37  | Left       | LF (43), RF (23), RP (18)                                         | LF (5.0), LF (16.1), RP (4.9), RP (14.2), RF (16.8), LF (5.1), LF (4.7)            | 27.5             |
| 159        | F   | 43  | Left       | LF (38), LT (2), LP (14), LT (34), RF (9), RP (2), RT (10)        | LF (20.9), LT (7.9), LP (11.1), LF (6.5), LT (15.3), RF (4.9)                      | 23.8             |
| 162        | F   | 31  | Unknown    | RF (11), RT (2), RO (3), RP (6), RT (23)                          | RT (7.7), RT (16.9), RF (5.2), RF (8.2), RF (19.0), RP (5.1)                       | 25.7             |
| 167        | M   | 33  | Left       | LF (20), LO (1), LP (4), LT (42), RF (1)                          | LT (7.9), LT (21.0), LF (7.9), LF (19.0), LP (18.6)                                | 44.6             |
| 172        | F   | 22  | Left       | RF (10), RP (2), RT (12)                                          | RF (22.6)                                                                          | 19.3             |
| 175        | M   | 34  | Unknown    | LT (16), RF (29), RO (5), RP (22), RT (18)                        | RF (6.0), LT (6.2), RP (14.5), RF (18.9), LT (6.1), RT (21.6), LT (14.1)           | 22.7             |
| 184        | M   | 42  | Unknown    | RF (3), RO (2), RP (27), RT (16)                                  | RP (5.8), RP (14.8), RF (19.5)                                                     | 25.5             |
| 186        | M   | 28  | Unknown    | LP (3), LT (8), RF (32), RP (29), RT (31)                         | RF (6.2), RF (20.0), RP (14.1), RT (9.3), RF (5.4)                                 | 8.3              |
| 187        | F   | 52  | Unknown    | LF (49), LT (2), LO (3), LP (30), LT (19), RF (1)                 | LF (16.1), LP (7.8)                                                                | 13               |
| 195        | M   | 44  | Left       | LF (11), LP (8), LT (7), RF (13), RP (5)                          | RF (24.3), RF (10.4), LP (22.5), LT (7.8), LF (14.7)                               | 30.4             |
| 196        | M   | 19  | Unknown    | LF (30), LO (1), LP (28), LT (11)                                 | LP (7.2), LP (18.9), LT (21.6), LT (7.0)                                           | 37.3             |
| 201        | M   | 37  | Left       | RF (16), RT (3), RO (5), RP (28), RT (33)                         | RP (10.7), RP (16.4)                                                               | 23               |
| 202        | F   | 30  | Unknown    | LF (4), RF (14), RO (14), RP (5), RT (26)                         | RT (10.4), RT (20.3), RF (5.2), RO (15.0)                                          | 18.8             |
| 215        | F   | 51  | Left       | LF (16), LT (32)                                                  | LT (8.0), LT (16.9)                                                                | 24.3             |
| 221        | M   | 57  | Left       | LF (41), LT (39), LP (18), RF (1), RP (1)                         | LT (14.5), LT (8.9), LF (21.8), LF (16.6)                                          | 30               |
| 222        | F   | 21  | Left       | LF (50), LP (10), LT (21), RF (11)                                | LF (19.9), LF (5.6), LF (8.7)                                                      | 27.2             |
| 226        | F   | 42  | Unknown    | LF (31), LP (8), LT (35)                                          | LT (22.5)                                                                          | 25.6             |
| 232        | M   | 28  | Left       | LF (13), LP (11), LT (18), RF (10), RP (14), RT (14)              | RP (6.0)                                                                           | 47               |
| 234        | M   | 25  | Unknown    | LF (2), LP (5), LT (49), RT (24)                                  | LT (13.7), LT (3.9), RT (13.9), LT (22.4), LT (6.2), RT (3.7)                      | 25.5             |
| 250        | M   | 30  | Left       | LF (1), LO (4), LP (10), RF (8), RO (23), RP (55), RT (20)        | RP (20.2), RP (6.7), RP (12.3), LP (20.5), LP (12.0), LP (6.9), RP (12.8)          | 45.7             |
| 260        | F   | 57  | Unknown    | LF (28), LT (46), LO (4), LP (18)                                 | LT (20.3)                                                                          | 25.4             |
| 291        | M   | 35  | Left       | LF (21), LP (23), LT (32)                                         | LT (6.7)                                                                           | 35.7             |

**Table S2: Subject Table: Verbal Memory Paradigm** Each row summarizes an individual patient's sex, age, handedness, clinical electrode coverage of surface grid and strip electrodes, frequency and regional properties of clusters with TWs, and memory performance. The "Subject electrode coverage" column denotes the hemisphere, region, and number of surface electrodes in the region. The "Traveling waves" column denotes the hemisphere and region where the majority of electrodes in the cluster were located. The mean frequency of oscillations for the cluster is in parentheses. Region Key: F, Frontal; T, temporal; O, occipital; P, parietal.

| Subject ID | Sex | Age | Handed-ness  | Electrode coverage: Left hemisphere | Electrode coverage: Right hemisphere | Travelling waves                                | Percent accuracy | Mean RT |
|------------|-----|-----|--------------|-------------------------------------|--------------------------------------|-------------------------------------------------|------------------|---------|
| 1          |     |     |              | TO grid                             |                                      | LT $\alpha$                                     | 84.4             | 1310    |
| 2          | M   | 17  | Right        | strips                              |                                      | LT $\theta$ LF $\theta$                         | 96.2             | 703     |
| 3          | M   | 15  | Right        | F Grid + strips + midline Grid      |                                      | LF $\theta$ LF $\theta$                         | 97.7             | 790     |
| 4          | F   | 8   | Right        | strips                              | T grid+ strips                       |                                                 | 85.5             | 1728    |
| 5          | M   | 17  | Unknown      | P Grid + strips                     | strips                               |                                                 | 83.3             | 21276   |
| 6          |     |     | Unknown      |                                     | T grid + strips                      | RT $\theta$ RT $\theta$ RP $\alpha$             |                  |         |
| 7          | F   | 20  | Right        | F grid +strips                      | strips                               | RT $\alpha$                                     | 91.2             | 1303    |
| 8          |     |     | Unknown      |                                     | strips                               | RF $\theta$ LF $\theta$ RF $\theta$             | 92.6             | 1325    |
| 9          |     |     | Unknown      |                                     | POT grid                             | RP $\theta$                                     | 91.1             | 900     |
| 10         |     |     | Unknown      | TO grid                             |                                      | LP $\alpha$                                     | 96.1             | 904     |
| 11         |     |     | Unknown      | PT grid                             | strips                               | RT $\theta$ LP $\alpha$                         | 90.5             | 1771    |
| 12         |     |     | Unknown      |                                     | P strips                             | RP $\theta$                                     | 71.7             | 2220    |
| 13         | M   | 20  | Right        |                                     | TPO grid                             | RP $\theta$                                     | 89.1             | 845     |
| 14         | F   | 53  | Unknown      | strips                              |                                      |                                                 | 85.8             | 1892    |
| 15         | M   | 50  | Right        | T grid                              |                                      | LP $\theta$ LT $\alpha$                         | 79.2             | 2941    |
| 16         | M   | 28  | Unknown      | F grid + TO grid                    |                                      | LT $\alpha$                                     | 94               | 939     |
| 17         | F   | 30  | Unknown      | strips                              |                                      |                                                 | 84.4             | 1271    |
| 18         | M   | 23  | Unknown      | T grid                              |                                      | LT $\alpha$                                     | 84.9             | 983     |
| 19         | M   | 18  | Right        | T grid                              | strips                               | LT $\theta$ LT $\theta$ LT $\alpha$             | 78.1             | 550     |
| 20         | F   | 43  | Unknown      |                                     | strips                               | RT $\alpha$                                     | 82.9             | 1075    |
| 21         | M   | 42  | Unknown      |                                     | strips                               | RT $\theta$ RT $\alpha$                         | 79.8             | 6109    |
| 22         | F   | 22  | Left         | strips                              |                                      | LT $\theta$                                     | 81.2             | 1085    |
| 23         | M   | 47  | Right        |                                     | T grid + strips                      | RT $\alpha$ RT $\alpha$                         | 76.7             | 842     |
| 24         | F   | 27  | Right        | strips                              | strips                               | RT $\theta$                                     | 86.7             | 1035    |
| 25         | M   | 20  | Right        |                                     | strips                               | RF $\theta$                                     | 84.5             | 2221    |
| 26         | M   | 16  | Right        | FP grid +strips                     |                                      | LF $\theta$ LF $\alpha$                         | 79.1             | 952     |
| 27         | M   | 15  | Right        |                                     | T grid                               |                                                 | 79.1             | 1544    |
| 28         | M   | 21  | Right        | TPO grid                            |                                      | LT $\theta$ LT $\alpha$ LT $\alpha$             | 73.3             | 1544    |
| 29         | F   | 40  | Right        | strips                              | strips                               | LT $\theta$ RT $\alpha$ LT $\alpha$             | 84.8             | 731     |
| 30         | F   | 34  | Right        | strips                              | strips                               | LT $\theta$ RT $\alpha$ LT $\alpha$             | 95.3             | 607     |
| 31         | F   | 34  | Right        | strips                              | strips                               | RT $\alpha$ LT $\alpha$                         | 95.1             | 671     |
| 32         | F   | 39  | Right        | strips                              | strips                               | RT $\alpha$ RF $\theta$ LT $\alpha$             | 92.6             | 539     |
| 33         | M   | 30  | Left         |                                     | F grid + P grid + T grid             | RP $\alpha$ RT $\alpha$ RF $\theta$             | 89.7             | 1928    |
| 34         | M   | 30  | Left         |                                     | FP grid + strips                     | RF $\theta$ RF $\theta$ RP $\theta$             |                  |         |
| 35         | F   | 23  | Right        | F_ $\theta$ P grid + strips         | strips                               | RF $\alpha$ RF $\alpha$                         | 79.1             | 4660    |
| 36         | M   | 29  | Right        | strips                              |                                      | LT $\alpha$                                     | 95.4             | 816     |
| 37         | F   | 25  | Right        | FP grid + strips                    |                                      | LF $\alpha$ LT $\alpha$                         | 90               | 968     |
| 38         | F   | 25  | Right        | strips                              |                                      |                                                 | 87               | 1493    |
| 39         | M   | 43  | Right        | strips                              | strips                               |                                                 | 96.1             | 1405    |
| 40         | F   | 38  | Left         | strips                              |                                      | LT $\alpha$ LP $\alpha$                         | 94.4             | 1238    |
| 41         | M   | 21  | Right        | TP grid + strips                    | strips                               | LF $\theta$ LF $\theta$ LF $\theta$ LT $\alpha$ |                  |         |
| 42         | M   | 56  | Right        | strips                              |                                      | RF $\alpha$                                     | 97.1             | 1534    |
| 43         | F   | 57  | Right        | TP grid + strips                    |                                      | LT $\theta$                                     | 95.2             | 1056    |
| 44         | M   | 20  | Right        | strips                              | strips                               | LT $\alpha$                                     | 93.8             | 1987    |
| 45         | M   | 20  | Right        | strips                              | strips                               | LF $\theta$ RF $\theta$                         | 96.7             | 1170    |
| 46         | M   | 20  | Right        | strips                              | strips                               | RF $\theta$ LF $\theta$ RF $\theta$ LF $\theta$ | 94.8             | 1385    |
| 47         | M   | 41  | Right        | strips                              | strips                               | RT $\alpha$ RP $\alpha$                         | 98.4             | 980     |
| 48         | F   | 34  | Right        | T grid + strips                     |                                      | RP $\alpha$                                     | 91.4             | 2014    |
| 49         | F   | 52  | Left         |                                     | TP grid +strips                      | RT $\alpha$                                     | 99.5             | 1272    |
| 50         | M   | 44  | Right        | strips                              | strips                               | RF $\theta$ RT $\alpha$                         | 94.8             | 504     |
| 51         | M   | 35  | Right        | strips                              | strips                               | RF $\theta$ RF $\theta$ RP $\theta$ LF $\theta$ | 88.3             | 1747    |
| 52         | F   | 44  | Right        | strips                              | strips                               | LT $\alpha$ RT $\alpha$                         | 97.4             | 1767    |
| 53         | M   | 33  | Right        | strips                              | strips                               | RF $\theta$ LF $\theta$ RT $\alpha$             | 97.7             | 1089    |
| 54         | F   | 23  | Right        | strips                              | TO grid + strips                     | RP $\alpha$ LT $\alpha$                         | 94.8             | 1800    |
| 55         | F   | 48  | Right        | strips                              | strips                               | LT $\alpha$                                     | 99               | 1438    |
| 56         | M   | 45  | Right        | strips                              | strips                               | RT $\alpha$ RT $\alpha$ LT $\alpha$             | 99.5             | 1122    |
| 57         | M   | 15  | Right        | strips                              | strips                               | RT $\theta$                                     | 88               | 688     |
| 58         | M   | 53  | Right        | strips                              | strips                               | LT $\theta$                                     | 91.7             | 3620    |
| 59         | M   | 29  | Right        | strips                              | strips                               | LF $\theta$ LT $\alpha$                         | 98.4             | 1581    |
| 60         | F   | 48  | Right        | strips                              | strips                               | RP $\alpha$ LP $\alpha$                         | 97.7             | 1747    |
| 61         | F   | 20  | Right        | strips                              | strips                               | RF $\theta$ RF $\theta$ RF $\alpha$             |                  |         |
| 62         | M   | 50  | Right        | strips                              | strips                               | RF $\alpha$ LP $\alpha$                         | 96.8             | 575     |
| 63         | M   | 18  | Right        | strips                              | strips                               | LF $\theta$ LF $\alpha$                         | 96.9             | 1082    |
| 64         | M   | 18  | Right        | strips                              | strips                               | LT $\alpha$                                     | 94.8             | 1341    |
| 65         | F   | 44  | Right        | strips                              | strips                               | LT $\theta$ LF $\theta$ RT $\alpha$ LT $\alpha$ | 80.3             | 3058    |
| 66         | M   | 28  | Right        | strips                              | strips                               | LF $\theta$                                     | 95.1             | 877     |
| 67         | F   | 26  | Right        | strips                              | strips                               | RF $\alpha$ LF $\theta$                         | 79.7             | 1382    |
| 68         | F   | 27  | Right        | strips                              | strips                               | LT $\theta$                                     | 76.1             | 1082    |
| 69         | F   | 55  | Left         | strips                              | strips                               | LF $\alpha$ RF $\alpha$ RP $\alpha$             | 70               | 4108    |
| 70         | F   | 58  | Right        | strips                              | TPO grid+ strips                     | RT $\alpha$                                     | 79.6             | 2576    |
| 71         | M   | 18  | Ambidextrous | strips                              | strips                               |                                                 | 83.7             | 1331    |
| 72         | F   | 49  | Left         | FP grid +strips                     | strips                               | LF $\theta$ LF $\theta$ LP $\theta$             | 88.4             | 2135    |
| 73         | M   | 40  | Right        | strips                              | strips                               | LP $\alpha$ RF $\theta$ RT $\theta$             | 94               | 822     |
| 74         | M   | 37  | Right        | strips                              | strips                               | LF $\theta$ RF $\theta$                         | 96.4             | 842     |
| 75         | M   | 20  | Left         | FP grid +strips                     | strips                               | LF $\theta$ RF $\theta$ LF $\alpha$             | 94.8             | 1277    |
| 76         | M   | 37  | Right        |                                     | FTP grid+ strips                     | RF $\alpha$                                     | 97.4             | 986     |
| 77         | M   | 42  | Right        |                                     | T grid                               |                                                 | 93.2             | 4395    |
| 78         | F   | 28  | Left         | strips                              | FTP grid+ strips                     | RF $\theta$ RF $\theta$                         | 94.3             | 3808    |
| 79         | F   | 30  | Left         | strips                              | strips                               | LF $\theta$ LF $\theta$ LF $\theta$ RT $\theta$ |                  |         |
| 80         | M   | 33  | Right        | FTP grid + strips                   |                                      | RP $\theta$                                     | 84.9             | 2625    |
| 81         | M   | 33  | Right        | FTP grid + strips                   |                                      |                                                 | 95.3             | 960     |
| 82         | M   | 37  | Right        | FTP grid + strips                   |                                      | LT $\alpha$                                     | 97.4             | 1084    |

**Table S3: Subject Table: Sternberg Working Memory Task** Each row summarizes an individual patient's sex, age, handedness, clinical electrode coverage of surface grid and depth electrodes, oscillatory band and regional properties of clusters with TWs, memory performance, and mean response time. The "Electrode coverage" columns denote the regions with surface electrodes and types of electrodes. The "Traveling waves" column denotes the hemisphere, region where the majority of electrodes were located in the cluster, and the band of the peak frequency of the cluster. Region Key: F, Frontal; T, temporal; O, occipital; P, parietal.

| Oscillatory Range         | Wave directional consistency across trials |      |                                | Local directional consistency across electrodes (Planarity) |      |                     | Wave strength (R <sup>2</sup> ) |      |                     | Power |      |                     | Propagation Speed (m/s) |      |                     | Spatial wavelength (m) |       |                     |
|---------------------------|--------------------------------------------|------|--------------------------------|-------------------------------------------------------------|------|---------------------|---------------------------------|------|---------------------|-------|------|---------------------|-------------------------|------|---------------------|------------------------|-------|---------------------|
|                           | S                                          | U    | T stat, P value                | S                                                           | U    | T stat, P value     | S                               | U    | T stat, P value     | S     | U    | T stat, P value     | S                       | U    | T stat, P value     | S                      | U     | T stat, P value     |
| <b>Frontal</b>            |                                            |      |                                |                                                             |      |                     |                                 |      |                     |       |      |                     |                         |      |                     |                        |       |                     |
| <b>Theta</b>              | 0.15                                       | 0.11 | t = 5.64, p < 10 <sup>-6</sup> | 0.36                                                        | 0.36 | t = -1.47, p = 0.15 | 0.28                            | 0.27 | t = 0.48, p = 0.63  | 2.73  | 2.74 | t = -1.37, p = 0.18 | 0.47                    | 0.48 | t = 0.71, p = 0.49  | 22.31                  | 22.1  | t = 0.74, p = 0.46  |
| <b>Alpha</b>              | 0.14                                       | 0.11 | t = 5.87, p < 10 <sup>-6</sup> | 0.34                                                        | 0.34 | t = 1.01, p = 0.34  | 0.31                            | 0.30 | t = 1.68, p = 0.12  | 3.1   | 3.09 | t = 0.54, p = 0.6   | 0.64                    | 0.64 | t = 0.53, p = 0.62  | 22.93                  | 21.15 | t = -0.68, p = 0.51 |
| <b>Beta</b>               | 0.12                                       | 0.08 | t = 6.87, p < 10 <sup>-7</sup> | 0.32                                                        | 0.32 | t = 1.37, p = 0.18  | 0.34                            | 0.34 | t = 0.04, p = 0.97  | 2.38  | 2.38 | t = -1.89, p = 0.07 | 1.32                    | 1.31 | t = 0.48, p = 0.64  | 17.87                  | 17.79 | t = 1.13, p = 0.27  |
| <b>Temporal</b>           |                                            |      |                                |                                                             |      |                     |                                 |      |                     |       |      |                     |                         |      |                     |                        |       |                     |
| <b>Theta</b>              | 0.17                                       | 0.14 | t = 7.9, p < 10 <sup>-6</sup>  | 0.28                                                        | 0.28 | t = 0.37, p = 0.71  | 0.32                            | 0.32 | t = 1.2, p = 0.25   | 3.08  | 3.08 | t = -0.19, p = 0.85 | 0.57                    | 0.58 | t = -1.42, p = 0.18 | 23.81                  | 24.05 | t = -1.15, p = 0.26 |
| <b>Alpha</b>              | 0.18                                       | 0.14 | t = 2.89, p = 0.01             | 0.2                                                         | 0.2  | t = 0.73, p = 0.48  | 0.22                            | 0.22 | t = 1.09, p = 0.29  | 2.98  | 2.99 | t = -1.55, p = 0.14 | 0.82                    | 0.83 | t = -0.72, p = 0.49 | 22.58                  | 22.55 | t = 0.26, p = 0.8   |
| <b>Beta</b>               | 0.11                                       | 0.08 | t = 6.99, p < 10 <sup>-6</sup> | 0.3                                                         | 0.31 | t = -1.94, p = 0.06 | 0.24                            | 0.24 | t = 0.43, p = 0.67  | 2.69  | 2.69 | t = -0.93, p = 0.36 | 1.16                    | 1.17 | t = -1.81, p = 0.09 | 19.12                  | 19.1  | t = 0.42, p = 0.68  |
| <b>Parietal/Occipital</b> |                                            |      |                                |                                                             |      |                     |                                 |      |                     |       |      |                     |                         |      |                     |                        |       |                     |
| <b>Theta</b>              | 0.17                                       | 0.16 | t = 2.18, p = 0.04             | 0.33                                                        | 0.33 | t = -2.45, p = 0.02 | 0.22                            | 0.22 | t = 0.47, p = 0.64  | 2.82  | 2.83 | t = -1.36, p = 0.19 | 0.49                    | 0.49 | t = 0.15, p = 0.88  | 24.16                  | 24.35 | t = -1.06, p = 0.3  |
| <b>Alpha</b>              | 0.12                                       | 0.11 | t = 1.55, p = 0.16             | 0.54                                                        | 0.54 | t = -1.3, p = 0.23  | 0.33                            | 0.34 | t = -1.08, p = 0.33 | 2.52  | 2.53 | t = -0.81, p = 0.44 | 0.83                    | 0.84 | t = -4.84, p = 0.02 | 26.67                  | 26.31 | t = 1.29, p = 0.23  |
| <b>Beta</b>               | 0.11                                       | 0.08 | t = 3.14, p < 0.01             | 0.37                                                        | 0.37 | t = 0.68, p = 0.5   | 0.15                            | 0.15 | t = -0.42, p = 0.68 | 2.46  | 2.46 | t = 0.59, p = 0.56  | 1.4                     | 1.42 | t = -1.14, p = 0.29 | 19.57                  | 19.72 | t = -1.36, p = 0.19 |

**Table S4: Relation between memory encoding and traveling wave characteristics.** Rows denote each combination of region and oscillatory range. Each group of columns shows the relation between memory and the following TW features: wave directional consistency across trials, local directional consistency within a wave (measured across electrodes), wave strength, narrowband power, propagation speed, and spatial wavelength. Within each group, columns “S” and “U” indicate the mean value of each traveling-wave characteristic (see Methods) on trials with successfully and unsuccessfully encoding, respectively. We measured the statistical significance across clusters with TWs with paired t tests.



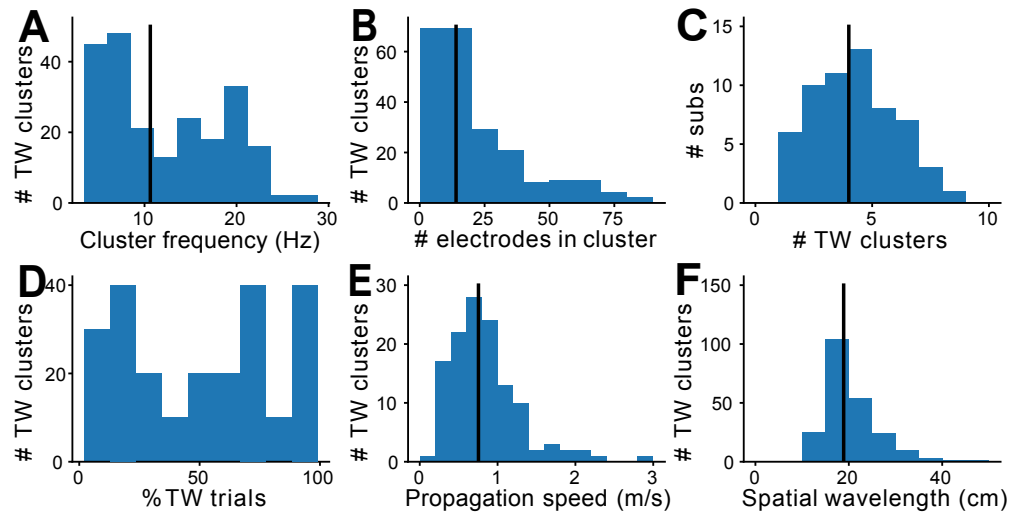

**Figure S1: Characteristics of cortical traveling waves in the episodic memory task. (A)** Histogram of the peak oscillation frequencies for clusters with TWs. **(B)** Histogram of the number of electrodes in each cluster. **(C)** Histogram of the counts of clusters per patient that showed TWs. Most subjects had 2 to 4 clusters across different sets of grid and strip electrodes or groups of electrodes with oscillations at different peak frequencies. A few patients had 5 or more. Patients with many clusters often had multiple smaller clusters of 5-6 electrodes in different regions and hemispheres. **(D)** Distribution of the percentage of single trials that show reliable TWs for individual clusters. **(E)** Histogram of TW propagation speed across clusters. Black line indicates median. **(F)** Histogram of TW spatial wavelength.

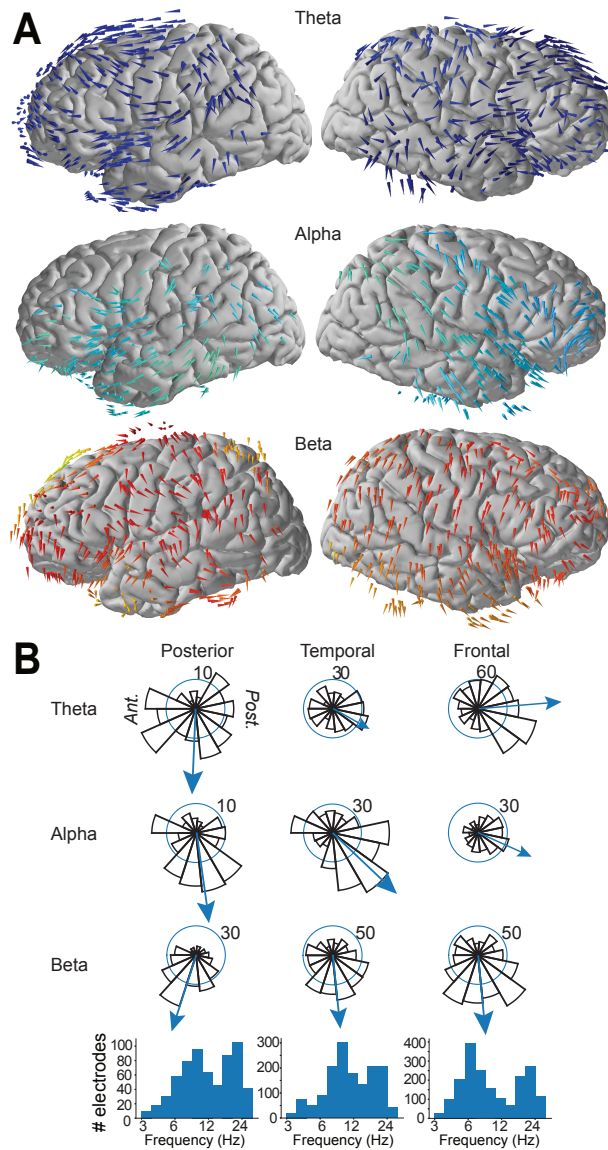

**Figure S2: Summary of traveling wave propagation directions in the working memory task. (A)** Arrows indicate the mean propagation directions of TWs in the theta (blue), alpha (teal), and beta (orange) frequency bands. The density of colored arrows indicates the prevalence of traveling waves at each frequency and the orientation of each arrow indicates the mean propagation direction. **(B)** Distribution of mean propagation directions for oscillation clusters across brain region and oscillatory bands. Bottom: histograms of the peak frequencies of electrodes by cortical region. These plots indicate that Theta-band TWs are common in the frontal and temporal lobes and usually propagate in a posterior-to-anterior direction. Alpha band TWs are present throughout the brain, except for the left frontal lobe. Alpha TWs generally propagate anteriorly, although alpha waves propagated posteriorly in some subjects. This plot shows that traveling waves in the beta band were present throughout the brain; however, they showed substantial variability in propagation directions as compared to the traveling waves seen in the theta and alpha bands.

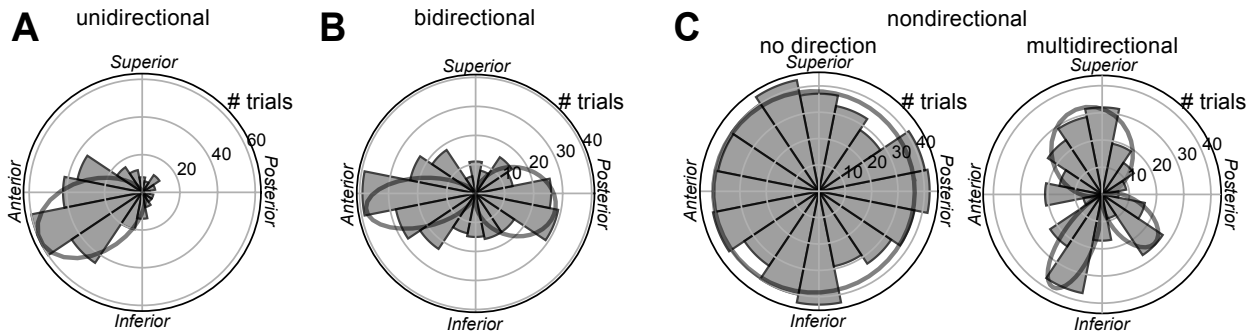

**Figure S3: Examples of clusters that showed traveling waves with different types of directional propagation patterns.** Plots show example direction distribution for TWs we labeled as propagating in (A) unidirectional, (B) bidirectional, and (C) nondirectional fashions.

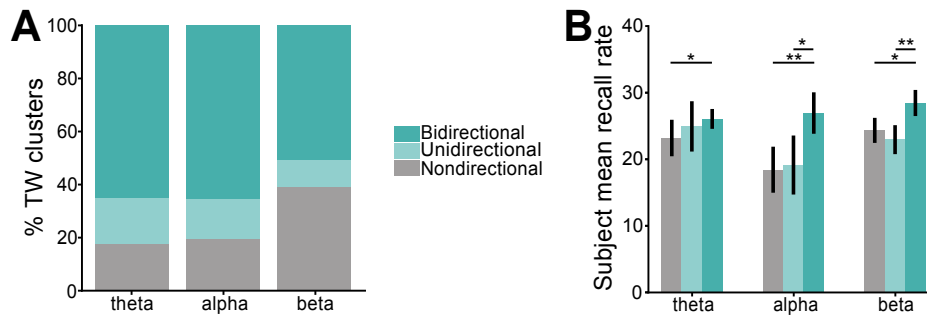

**Figure S4: Population categorization of cluster direction patterns in episodic memory task. (A)** Percent of TW clusters in each oscillatory range identified as bidirectional, unidirectional, and nondirectional. **(B)** Mean percent recall rates for subjects that showed a TW cluster with unidirectional, bidirectional, and nondirectional TW propagation, by frequency band (linear mixed effects model, bidirectional vs. unidirectional clusters:  $p=0.055$ ; bidirectional vs. nondirectional TW clusters:  $p=0.017$ ). Error bars denote  $\pm 1$  SEM. ( $*p < 0.05$ ,  $**p < 0.01$ ).

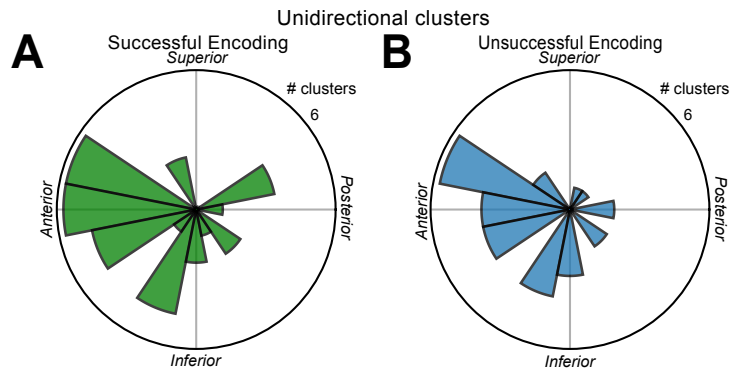

**Figure S5: Mean propagation directions during successful (A) and unsuccessful (B) memory encoding for the clusters labeled as unidirectional.** A direct comparison showed that the propagation directions of unidirectional clusters did not significantly differ between successful and unsuccessful encoding trials (Non parametric multi-sample test for equal medians,  $z = 0.91$ ,  $p = 0.34$ ).

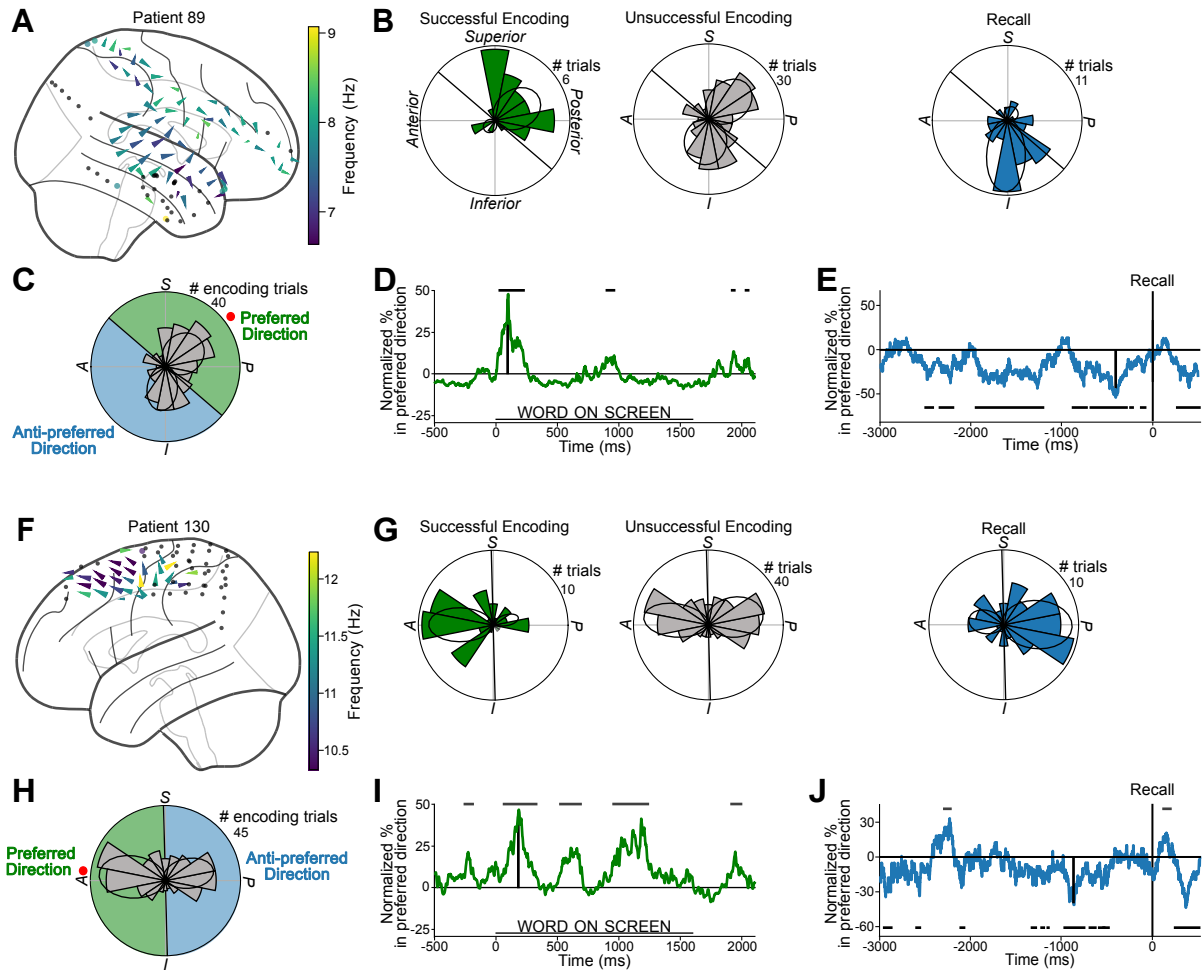

**Figure S6: Traveling waves in example subjects who showed a link between TW direction and memory. (A–E)** Example traveling wave in patient 89 at 7.8 Hz; format of individual plots follows Figure 3. **(F–J)** Example traveling wave frontal cortex of patient 130 at 10.8 Hz.

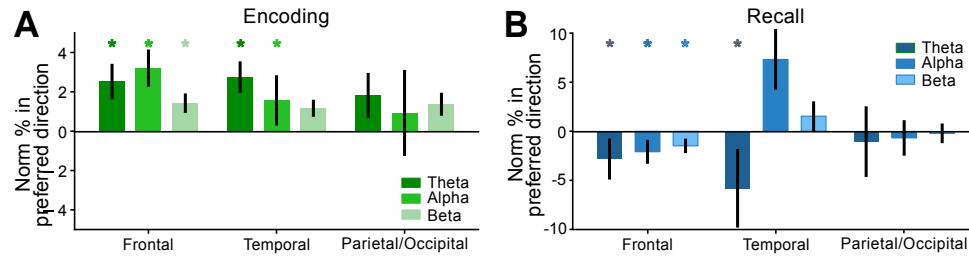

**Figure S7: Relation between TW directional shifts and memory processing.** **(A)** Normalized difference in the prevalence of TWs propagating in the preferred versus anti-preferred direction for successful relative to unsuccessful memory encoding (averaged across word presentation interval). Asterisks indicate specific regions and oscillatory bands where the normalized percent of TWs traveling in preferred directions across clusters is significantly above or below a distribution of shuffled TW directions ( $p$ 's < 0.05, binomial tests). **(B)** Normalized difference of TWs propagating in preferred versus anti-preferred direction averaged during 2 seconds prior to verbal recall.

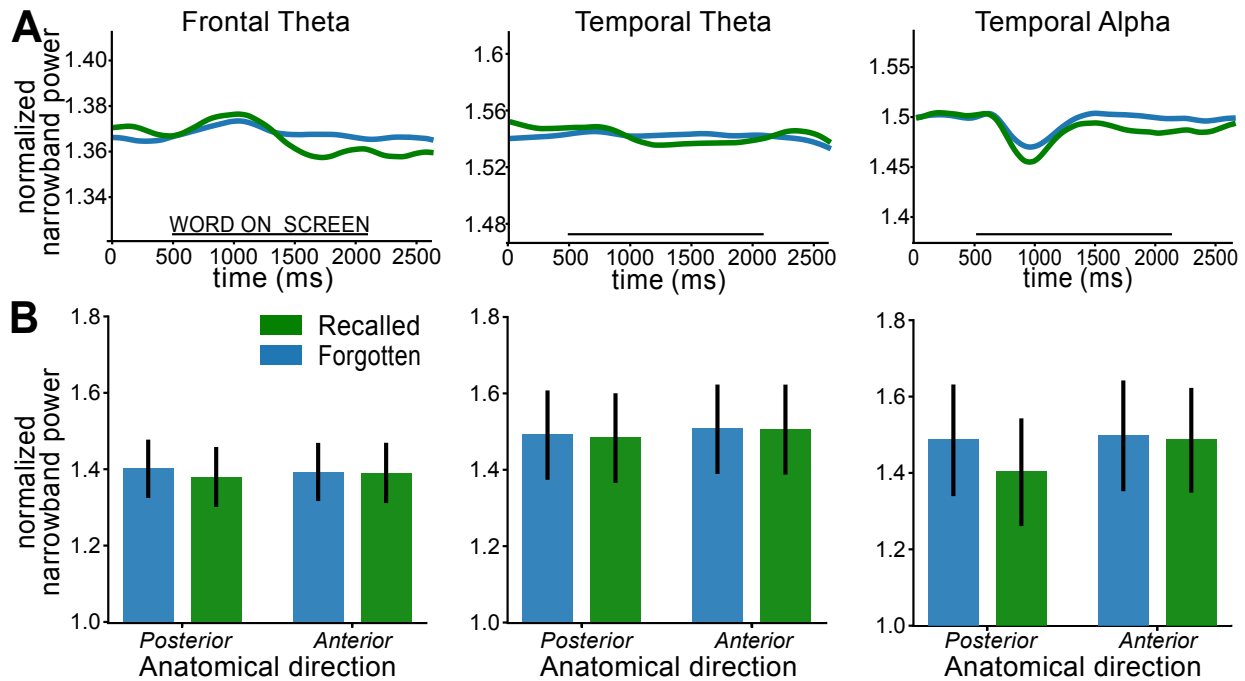

**Figure S8: Narrowband power at oscillation clusters that showed traveling waves in the episodic memory task.** (A) Mean normalized narrowband power centered around each oscillation cluster's peak frequency, calculated with the log-transformed amplitude of the Hilbert transform. (B) Mean normalized narrowband power for oscillation clusters that showed traveling waves averaged over time, separately calculated during time periods when TWs moved posteriorly and anteriorly, during successful and unsuccessful encoding trials. There were no significant differences in mean power across the clusters that showed posterior and anterior propagation ( $p$ 's > 0.05).



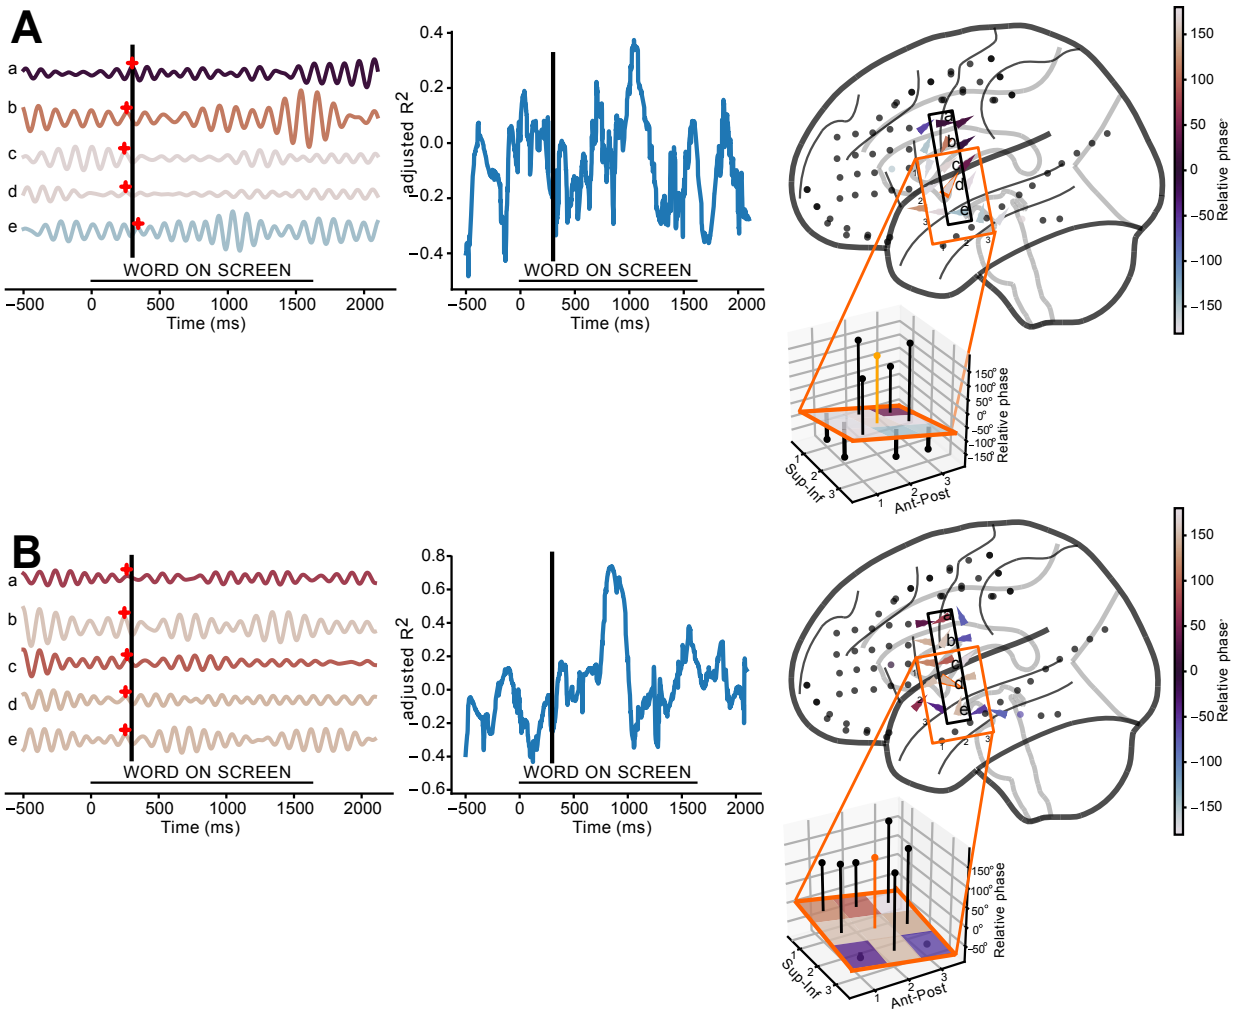

**Figure S9: Example data showing the absence of traveling waves. (A–B)** Example trials where a traveling wave was not present on a cluster that often showed 8.9-Hz oscillations that propagated as TWs on other trials. Data comes from from subject 34 (Fig. 1).
